# Supplementary material for: A crystalline T-shaped planar group 14 anion
Source: Royal Society of Chemistry journal article supplement (doi:10.1039/d2sc07006e), 2023-01-01
Supplement: d2sc07006e1.pdf [file d2sc07006e1.pdf]

## A Crystalline T-shaped Planar Group 14 Anion

Xiaona Liu,<sup>a</sup> Yuyang Dai,<sup>a</sup> Manling Bao,<sup>a</sup> Wenuan Wang,<sup>a</sup> Qianli Li,<sup>c</sup> Chunmeng Liu,<sup>a</sup> Xinping Wang,<sup>\*b</sup> and Yuanting Su<sup>\*a,b</sup>

<sup>a</sup> College of Chemistry, Chemical Engineering and Materials Science, School of Radiation Medicine and Protection, Soochow University, Suzhou 215123, China.

<sup>b</sup> State Key Laboratory of Coordination Chemistry, School of Chemistry and Chemical Engineering, Nanjing University, Nanjing 210023, China.

<sup>c</sup> School of Chemistry and Chemical Engineering, Liaocheng University, Liaocheng 252059, China.

E-mail: xpwang@nju.edu.cn; ytsu@suda.edu.cn

### Contents

|                                                           |     |
|-----------------------------------------------------------|-----|
| 1. Synthesis of new compounds and their NMR spectra ..... | S2  |
| 2. Crystal structural parameters.....                     | S19 |
| 3. EPR spectrum of <b>3</b> .....                         | S22 |
| 4. UV-vis absorption spectra.....                         | S22 |
| 5. Theoretical calculations .....                         | S24 |
| 6. References .....                                       | S56 |

## 1. Synthesis of new compounds and their NMR spectra

**General considerations:** All reactions and product manipulations were conducted under a dry dinitrogen atmosphere with rigid exclusion of air and moisture using standard Schlenk techniques, or in a glove box. All glasswares were oven dried. Organic solvents were distilled under nitrogen from purple sodium benzophenone ketyl and vacuum transferred from the same prior to use. Commercially available reagents were purchased from Energy Chemical and used as received.  $^1\text{H}$ ,  $^{13}\text{C}\{^1\text{H}\}$ , DEPT135,  $^7\text{Li}$  and  $^{77}\text{Se}\{^1\text{H}\}$  NMR spectra were obtained with a Bruker AVIII 400 MHz BBFO1 spectrometer and Agilent VNMRS-300 spectrometer at 298 K. Chemical shifts ( $\delta$ ) are given in p.p.m. Coupling constants  $J$  are given in Hz. NMR multiplicities are abbreviated as follows: s = singlet, d = doublet, t = triplet, m = multiplet, br = broad signal. UV-vis spectra were recorded on the Lambda 750 spectrometer at room temperature. EPR spectra were obtained using JEOL JES-X320 X-band variable-temperature apparatus. Electrospray ionization (ESI) mass spectra were obtained with the Waters Q-ToF Premier Mass Spectrometer. Element analyses were performed on an Elementar Vario EL III instrument. Compound **1** was synthesized according to the literature procedure.<sup>S1</sup>

### Synthesis of compound **2**

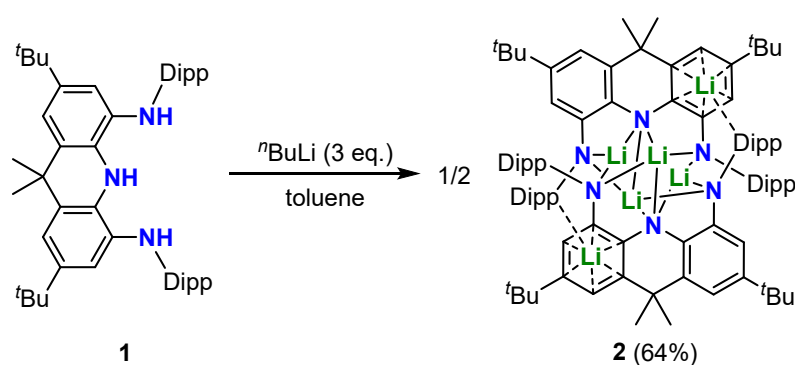

A hexane solution of  $n\text{BuLi}$  (0.9 ml, 1.6 M, 1.44 mmol) was added dropwise into a toluene/ $\text{Et}_2\text{O}$  (30 mL/0.5 mL) solution of **1** (302 mg, 0.45 mmol) at  $-78\text{ }^\circ\text{C}$  and the reaction mixture was stirred for 4 hours. After removal of the solvent under vacuum, the residue was washed with cooled hexane (10 ml) to afford **2** as a yellow powder (193 mg, 64%).  $^1\text{H}$  NMR ( $\text{C}_6\text{D}_6$ , 300 MHz, 298 K):  $\delta$  7.03–6.97 (m, 4H, Ar-H), 6.92

(d,  $J = 6.0$  Hz, 2H, Ar-*H*), 6.86 (d,  $J = 6.0$  Hz, 2H, Ar-*H*), 6.81 (s, 2H, Ar-*H*), 6.70 (d,  $J = 6.0$  Hz, 2H, Ar-*H*), 6.46 (s, 2H, Ar-*H*), 6.43–6.38 (m, 2H, Ar-*H*), 6.14 (s, 2H, Ar-*H*), 6.01 (s, 2H, Ar-*H*), 3.34 (br, 2H,  $(\text{CH}_3)_2\text{CH}$ ), 3.23 (br, 2H,  $(\text{CH}_3)_2\text{CH}$ ), 2.94 (br, 2H,  $(\text{CH}_3)_2\text{CH}$ ), 2.71 (br, 2H,  $(\text{CH}_3)_2\text{CH}$ ), 1.95 (s, 6H,  $\text{C}(\text{CH}_3)_2$ ), 1.68 (d,  $J = 6.0$  Hz, 6H,  $(\text{CH}_3)_2\text{CH}$ ), 1.59 (s, 6H,  $\text{C}(\text{CH}_3)_2$ ), 1.42 (s, 18H,  $\text{C}(\text{CH}_3)_3$ ), 1.38 (d, 6H,  $(\text{CH}_3)_2\text{CH}$ ), 1.28 (d, 12H,  $(\text{CH}_3)_2\text{CH}$ ), 1.05 (d,  $J = 6.0$  Hz, 6H,  $(\text{CH}_3)_2\text{CH}$ ), 0.98 (s, 18H,  $\text{C}(\text{CH}_3)_3$ ), 0.73 (d,  $J = 6.0$  Hz, 6H,  $(\text{CH}_3)_2\text{CH}$ ), 0.64 (d,  $J = 6.0$  Hz, 6H,  $(\text{CH}_3)_2\text{CH}$ ), 0.16 (d,  $J = 6.0$  Hz, 6H,  $(\text{CH}_3)_2\text{CH}$ ); Attempts to collect the  $^{13}\text{C}\{^1\text{H}\}$  NMR spectrum of compound **2** failed due to its bad solubility in  $\text{C}_6\text{D}_6$  and  $\text{C}_7\text{D}_8$  after isolation and unstability in THF- $\text{D}_8$ ;  $^7\text{Li}$  NMR ( $\text{C}_6\text{D}_6$ , 156 MHz, 298 K): 1.96 (s, 2Li), 0.49 (br, 2Li), -0.62 (br, 2Li). HRMS (ESI):  $m/z$  calcd for  $\text{C}_{94}\text{H}_{125}\text{Li}_6\text{N}_6$ : 1380.0891 [ $(M+H)^+$ ]; found: 1380.0926. Elemental analysis for  $\text{C}_{94}\text{H}_{120}\text{Li}_6\text{N}_6$  (%): Calculated: C 82.07; H 8.79, N 6.11; Found: C 82.19, H 8.83, N 5.99.

### Synthesis of compound **3**

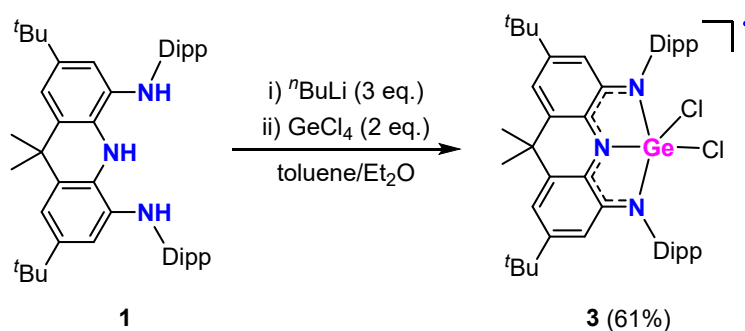

A hexane solution of  $^n\text{BuLi}$  (4.0 ml, 1.6 M, 6.4 mmol) was added dropwise into a mixture toluene/ $\text{Et}_2\text{O}$  (50 mL/1.5 mL) solution of **1** (1.34 g, 2.0 mmol) at  $-78$  °C and the reaction mixture was slowly warm up to  $10$  °C. The toluene solution (20 ml) of  $\text{GeCl}_4$  (0.86 g, 4.0 mmol) was added dropwise at  $-78$  °C. After slowly warming up to room temperature and stirred overnight, the solvent was removed under vacuum and the resulting residue was extracted with hexane (20 ml). After filtration and removal of the solvent, **3** was obtained as a purple powder (1.0 g, 61%). Single crystals of **3** suitable for X-ray diffraction studies were grown from its saturated hexane solution at room temperature. UV-vis (toluene):  $\lambda_{\text{max}} = 580$  and  $400$  nm. HRMS (ESI):  $m/z$  calcd

for  $C_{47}H_{62}Cl_2N_3Ge$ : 812.3533  $[(M)]^+$ ; found: 812.3532. Elemental analysis for  $C_{47}H_{64}Cl_2GeN_3$  (%): Calculated: C 69.30, H 7.92, N 5.16; Found: C 69.13, H 7.83, N 5.36.

#### Synthesis of compound 4

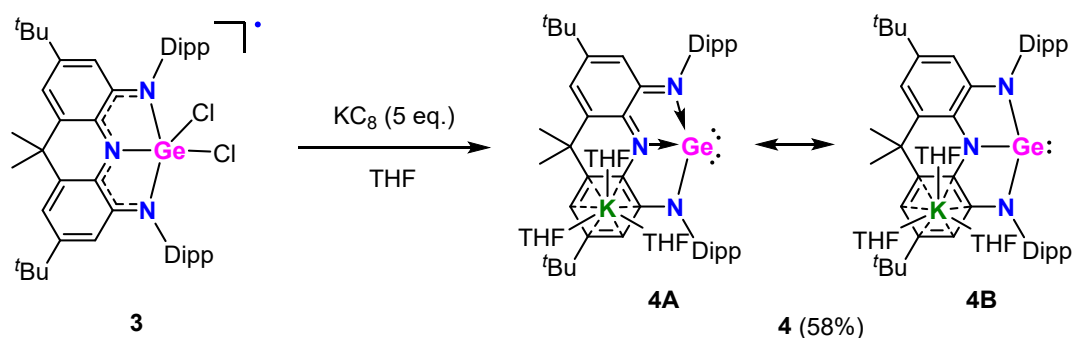

Potassium graphite (0.82 g, 6.1 mmol) was slowly added to a THF (100 ml) solution of **3** (0.97 g, 1.2 mmol) at  $-30$  °C. The reaction mixture was slowly warmed up to room temperature and stirred overnight. After filtration, the solvent was removed under vacuum and the residue was washed with cooled hexane (5 ml) to afford **4** as a yellow powder (0.69 g, 58%). Single crystals of **4** suitable for X-ray diffraction studies were grown from its saturated THF solution at  $-30$  °C.  $^1\text{H}$  NMR (THF- $d_8$ , 300 MHz, 298 K):  $\delta$  7.04 (d,  $J = 7.5$  Hz, 4H, Dipp-*m*-CH), 6.91–6.84 (m, 2H, Dipp-*p*-CH), 6.58 (s, 2H,  $\text{Me}_2\text{CCCH}$ ), 5.94 (s, 2H, DippNCCH), 3.60–3.56 (m, 12H, THF- $\text{CH}_2$ ), 3.14 (sep,  $J = 9.2$  Hz, 4H,  $(\text{CH}_3)_2\text{CH}$ ), 1.75–1.71 (m, 12H, THF- $\text{CH}_2$ ), 1.68 (s, 6H,  $\text{C}(\text{CH}_3)_2$ ), 1.21 (s, 18H,  $\text{C}(\text{CH}_3)_3$ ), 1.04 (d,  $J = 7.5$  Hz, 12H,  $(\text{CH}_3)_2\text{CH}$ ), 1.00 (d,  $J = 7.5$  Hz, 12H,  $(\text{CH}_3)_2\text{CH}$ );  $^{13}\text{C}$   $\{^1\text{H}\}$  NMR (THF- $d_8$ , 100 MHz, 298 K):  $\delta$  146.91 (Ar-C), 146.09 (Ar-C), 144.45 (Ar-C), 140.84 (Ar-C), 131.59 (Ar-C), 127.32 (Ar-C), 122.37 (Dipp-*p*-CH), 122.27 (Dipp-*m*-CH), 104.59 ( $\text{Me}_2\text{CCCH}$ ), 103.06 (DippNCCH), 68.02 (THF- $\text{CH}_2$ ), 37.64 ( $(\text{CH}_3)_2\text{C}$ ), 34.94 ( $(\text{CH}_3)_3\text{C}$ ), 34.40 ( $(\text{CH}_3)_2\text{C}$ ), 32.55 ( $(\text{CH}_3)_3\text{C}$ ), 27.97 ( $(\text{CH}_3)_2\text{CH}$ ), 26.76 ( $(\text{CH}_3)_2\text{CH}$ ), 26.14 (THF- $\text{CH}_2$ ), 24.99 ( $(\text{CH}_3)_2\text{CH}$ ). UV-vis (THF):  $\lambda_{\text{max}} = 309$  and 396 (shoulder) nm. HRMS (ESI):  $m/z$  calcd for  $C_{47}H_{62}N_3Ge$ : 742.4156  $[(M-K)]^-$ ; found: 742.4142. Elemental analysis for  $C_{59}H_{86}GeKN_3O_3$  (%): Calculated: C 71.07, H 8.69, O 4.81, N 4.21; Found: C 70.68, H 8.71, O 4.79, N 4.72.

#### Synthesis of compound 5

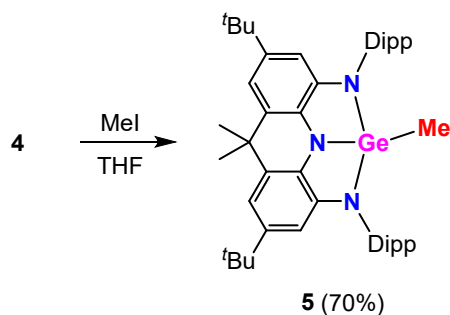

MeI (20  $\mu$ l, 45.6 mg, 0.32 mmol) was slowly added to a THF (5 ml) solution of **4** (0.32 g, 0.32 mmol) at room temperature and stirred for 20 mins. Then the solvent was removed under vacuum and the residue was washed with hexane to afford **6** as a yellow powder (0.17 g, 70%). Single crystals of **5** suitable for X-ray diffraction studies were grown from its saturated hexane solution at room temperature.  $^1\text{H}$  NMR ( $\text{C}_6\text{D}_6$ , 300 MHz, 298 K):  $\delta$  7.22 (br, 8H, Ar-*H*), 6.51 (s, 2H, DippNCCH), 3.20 (sept,  $J = 8.0$  Hz, 4H,  $(\text{CH}_3)_2\text{CH}$ ), 1.86 (s, 6H,  $(\text{CH}_3)_2\text{C}$ ), 1.31 (s, 18H,  $(\text{CH}_3)_3\text{C}$ ), 1.12 (d,  $J = 9.0$  Hz, 12H,  $(\text{CH}_3)_2\text{CH}$ ), 1.07 (d,  $J = 9.0$  Hz, 12H,  $(\text{CH}_3)_2\text{CH}$ ), 0.78 (s, 3H,  $\text{GeCH}_3$ );  $^{13}\text{C}\{^1\text{H}\}$  NMR ( $\text{C}_6\text{D}_6$ , 100 MHz, 298 K):  $\delta$  147.77 (Ar-C), 145.07 (Ar-C), 138.96 (Ar-C), 138.25 (Ar-C), 132.79 (Ar-C), 132.78 (Ar-C), 127.63 (Dipp-*CH*), 124.50 (Dipp-*CH*), 110.81 ( $\text{Me}_2\text{CCCH}$ ), 109.06 (DippNCCH), 39.47 ( $(\text{CH}_3)_2\text{C}$ ), 35.17 ( $(\text{CH}_3)_3\text{C}$ ), 32.18 ( $(\text{CH}_3)_2\text{C}$ ), 28.77 ( $(\text{CH}_3)_3\text{CH}$ ), 28.76 ( $(\text{CH}_3)_3\text{CH}$ ), 27.19 ( $(\text{CH}_3)_3\text{C}$ ), 25.99 ( $(\text{CH}_3)_3\text{CH}$ ), 24.17 ( $(\text{CH}_3)_3\text{CH}$ ), -1.47 (Ge- $\text{CH}_3$ ). UV-vis (THF):  $\lambda_{\text{max}} = 324$  nm. HRMS (ESI):  $m/z$  calcd for  $\text{C}_{48}\text{H}_{66}\text{N}_3\text{Ge}$ : 758.4469 [ $(M+H)^+$ ]; found: 758.4490. Elemental analysis for  $\text{C}_{48}\text{H}_{65}\text{GeN}_3$  (%): Calculated: C 76.19, H 8.66, N 5.55; Found: C 76.31, H 8.72, N 5.46.

### Synthesis of compound 6

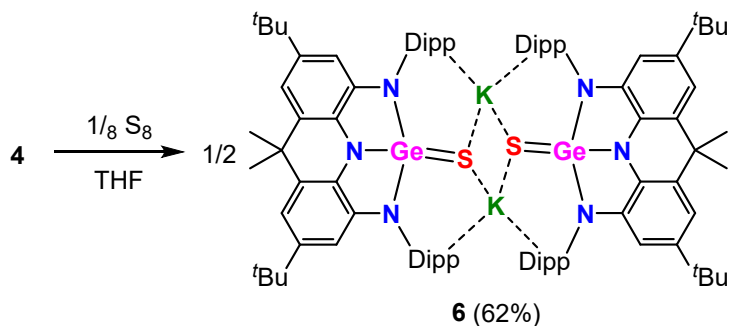

$\text{S}_8$  (6.4 mg, 0.025 mmol) was slowly added to a THF (5 ml) solution of **4** (0.20 g, 0.20

mmol) at room temperature. After stirring overnight, the solvent was removed under vacuum and the residue was washed with hexane to afford **6** as a yellow powder (0.10 g, 62%). Single crystals of **6** suitable for X-ray diffraction studies were grown from its saturated hexane/THF solution at room temperature.  $^1\text{H}$  NMR (THF- $d_8$ , 300 MHz, 298K):  $\delta$  7.14 (s, 6H, Dipp-CH), 6.64 (s, 2H, Me<sub>2</sub>CCCH), 5.83 (s, 2H, DippNCCH), 3.31 (sept,  $J = 8.8$  Hz, 4H, (CH<sub>3</sub>)<sub>2</sub>CH), 1.69 (s, 6H, C(CH<sub>3</sub>)<sub>2</sub>), 1.23 (d,  $J = 6.8$  Hz, 12H, (CH<sub>3</sub>)<sub>2</sub>CH), 1.10 (s, 18H, CH<sub>3</sub>), 0.90 (d,  $J = 6.7$  Hz, 12H, (CH<sub>3</sub>)<sub>2</sub>CH);  $^{13}\text{C}\{^1\text{H}\}$  NMR (THF- $d_8$ , 100 MHz, 298K):  $\delta$  149.70 (Ar-C), 143.50 (Ar-C), 142.55 (Ar-C), 140.82 (Ar-C), 135.38 (Ar-C), 131.86 (Ar-C), 125.70 (Dipp-CH), 123.84 (Dipp-CH), 108.08 (Me<sub>2</sub>CCCH), 107.96 (DippNCCH), 39.33 ((CH<sub>3</sub>)<sub>2</sub>C), 35.07 ((CH<sub>3</sub>)<sub>3</sub>C), 32.20 ((CH<sub>3</sub>)<sub>3</sub>CH), 29.06 ((CH<sub>3</sub>)<sub>2</sub>C), 25.97 ((CH<sub>3</sub>)<sub>3</sub>C), 25.65 ((CH<sub>3</sub>)<sub>3</sub>CH), 24.64 ((CH<sub>3</sub>)<sub>3</sub>CH). UV-vis (THF):  $\lambda_{\text{max}} = 332$  and 344 nm. HRMS (ESI):  $m/z$  calcd for C<sub>47</sub>H<sub>62</sub>N<sub>3</sub>GeS: 774.3865 [(M-K)]; found: 774.3876. Elemental analysis for C<sub>94</sub>H<sub>124</sub>Ge<sub>2</sub>K<sub>2</sub>N<sub>6</sub>S<sub>2</sub> (%): Calculated: C 69.45, H 7.69, N 5.17; Found: C 69.65, H 7.68, N 4.72.

### Synthesis of compound **7**

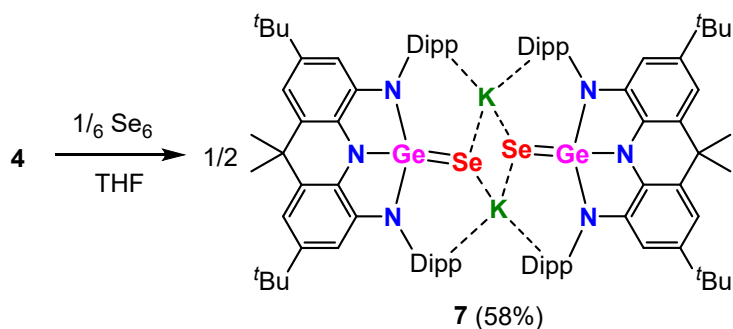

Se<sub>6</sub> (16 mg, 0.033 mmol) was added into a THF (3 ml) solution of **4** (0.20 g, 0.20 mmol) and the mixture was stirred at 90 °C for 12 h. After cooling down to room temperature, the solvent was removed under vacuum to afford **7** as a yellow powder (0.10 g, 58%). Single crystals of **7** suitable for X-ray diffraction studies were grown from its saturated hexane/THF solution at room temperature.  $^1\text{H}$  NMR (THF- $d_8$ , 400 MHz, 298 K):  $\delta$  7.18 (br, 6H, Dipp-CH), 6.68 (s, 2H, Me<sub>2</sub>CCCH), 5.85 (s, 2H, DippNCCH), 3.32 (sept,  $J = 6.8$  Hz, 4H, (CH<sub>3</sub>)<sub>2</sub>CH), 1.71 (s, 6H, CH<sub>3</sub>), 1.29 (d,  $J = 6.8$  Hz, 12H, CH<sub>3</sub>), 1.14 (s, 18H, CH<sub>3</sub>), 0.93 (d,  $J = 6.8$  Hz, 12H, CH<sub>3</sub>);  $^{13}\text{C}\{^1\text{H}\}$

NMR (THF-d<sub>8</sub>, 100 MHz, 298 K):  $\delta$  149.63 (Ar-C), 143.26 (Ar-C), 142.46 (Ar-C), 140.82 (Ar-C), 135.47 (Ar-C), 131.62 (Ar-C), 125.62 (Dipp-CH), 123.79 (Dipp-CH), 108.15 (DippNCCH), 107.92 (Me<sub>2</sub>CCCH), 39.20 ((CH<sub>3</sub>)<sub>2</sub>C), 35.05 ((CH<sub>3</sub>)<sub>3</sub>C), 32.19 ((CH<sub>3</sub>)<sub>2</sub>C), 29.14 ((CH<sub>3</sub>)<sub>3</sub>C), 26.11 ((CH<sub>3</sub>)<sub>3</sub>CH), 25.64 ((CH<sub>3</sub>)<sub>3</sub>CH), 24.84 ((CH<sub>3</sub>)<sub>3</sub>CH); <sup>77</sup>Se NMR (THF-d<sub>8</sub>, 114 MHz, 298 K): -271.93 (s). UV-vis (THF):  $\lambda_{\text{max}}$  = 333 and 344 nm. HRMS (ESI): *m/z* calcd for C<sub>47</sub>H<sub>62</sub>N<sub>3</sub>GeSe: 822.3321 [(*M-K*)<sup>-</sup>]; found: 822.3338. Elemental analysis for C<sub>94</sub>H<sub>124</sub>Ge<sub>2</sub>K<sub>2</sub>N<sub>6</sub>Se<sub>2</sub> (%): Calculated: C 65.66, H 7.27, N 4.89; Found: C 65.79, H 7.43, N 4.51.

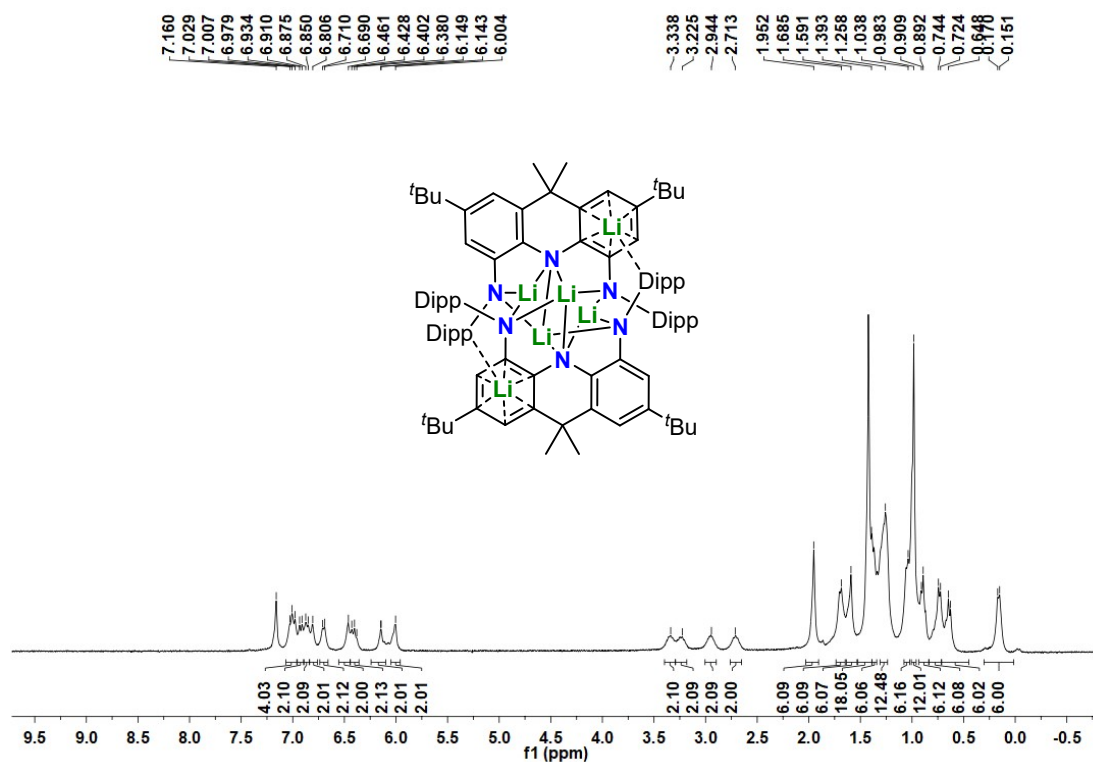

**Fig. S1** <sup>1</sup>H NMR spectrum of **2** in C<sub>6</sub>D<sub>6</sub> at 298 K.

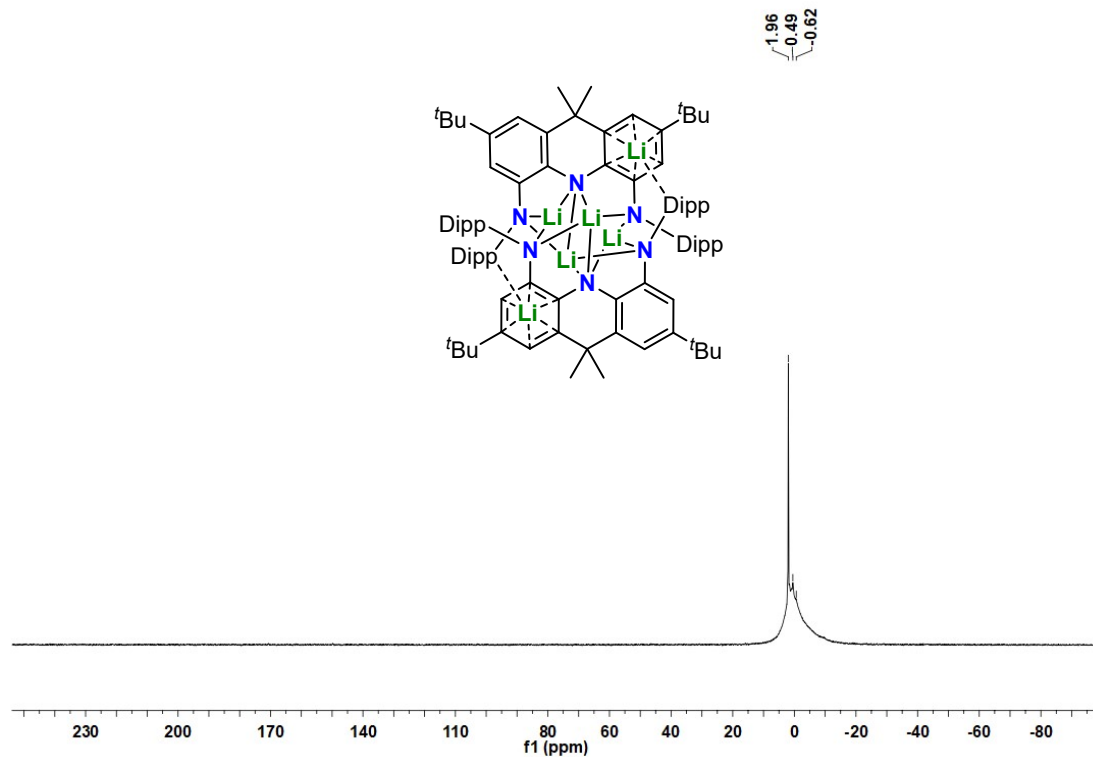

**Fig. S2** <sup>7</sup>Li NMR spectrum of **2** in C<sub>6</sub>D<sub>6</sub> at 298 K.



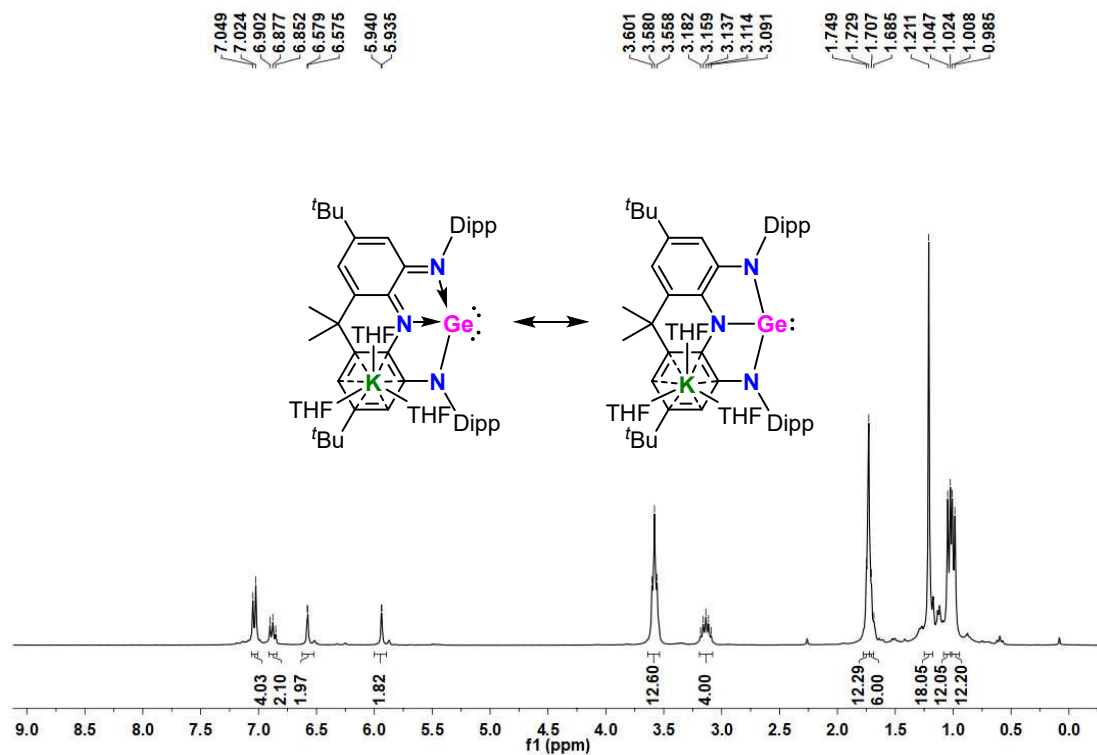

Fig. S3  $^1\text{H}$  NMR spectrum of **4** in THF- $\text{D}_8$  at 298 K.

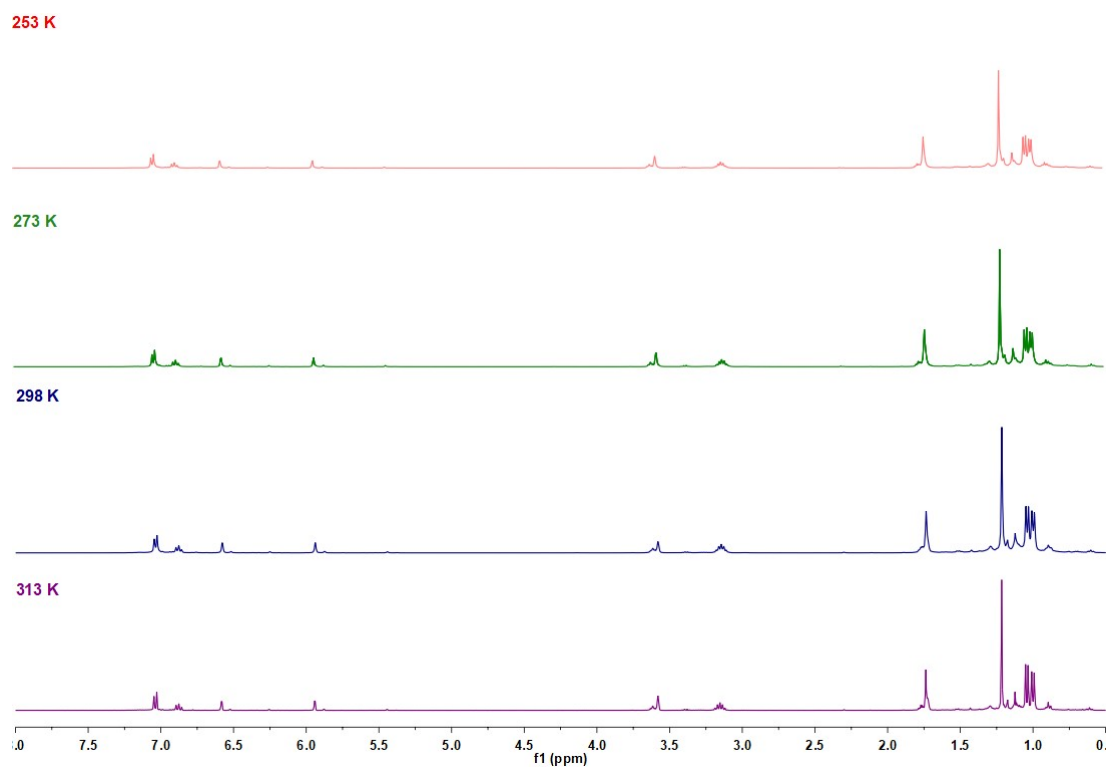

Fig. S4 VT- $^1\text{H}$  NMR spectrum of **4** in THF- $\text{D}_8$ .

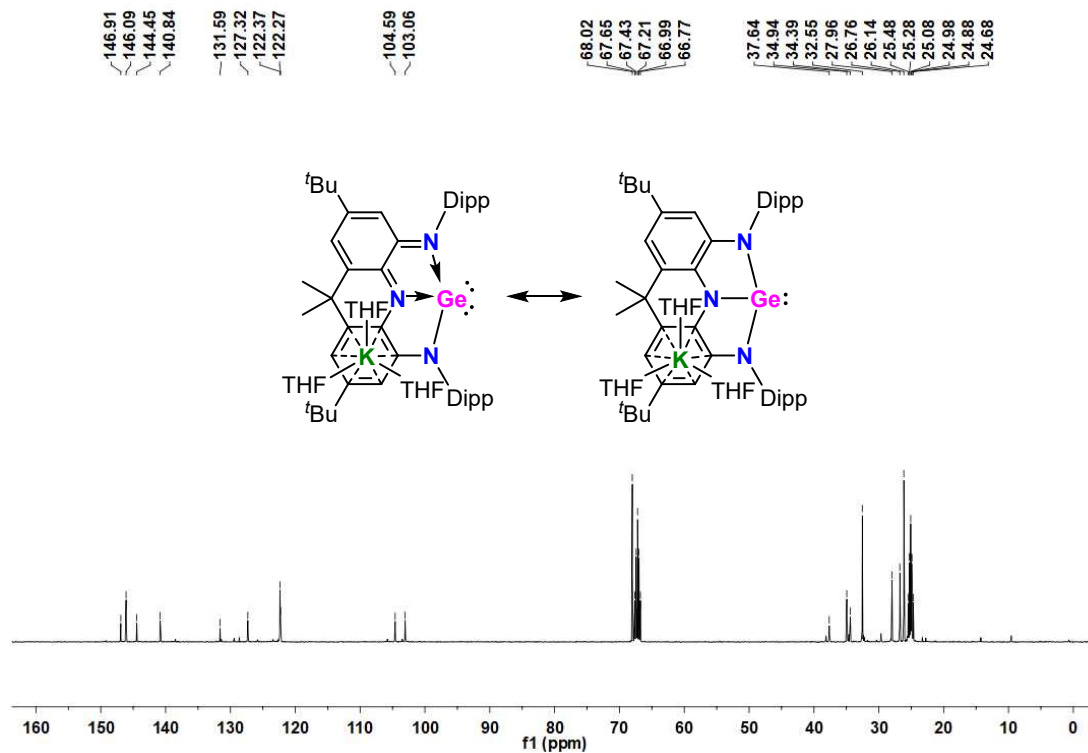

Fig. S5  $^{13}\text{C}\{^1\text{H}\}$  NMR spectrum of **4** in THF- $\text{D}_8$  at 298 K.

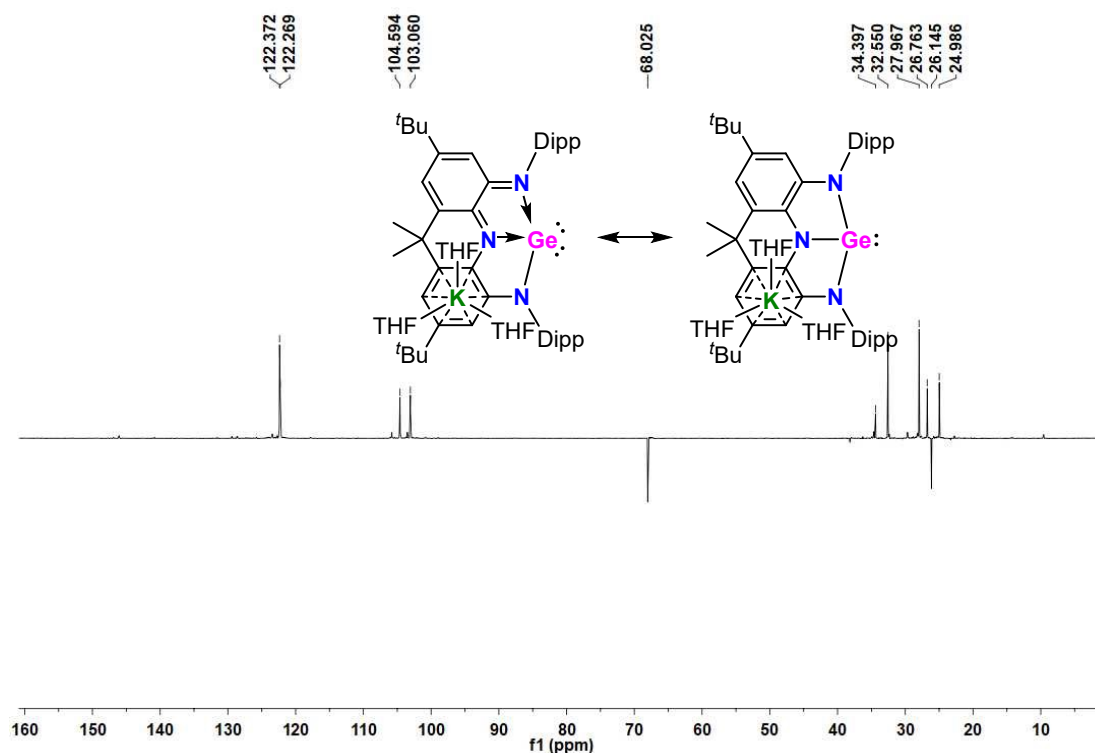

Fig. S6  $^{13}\text{C}(\text{DEPT}135)$  NMR spectrum of **4** in THF- $\text{D}_8$  at 298 K.

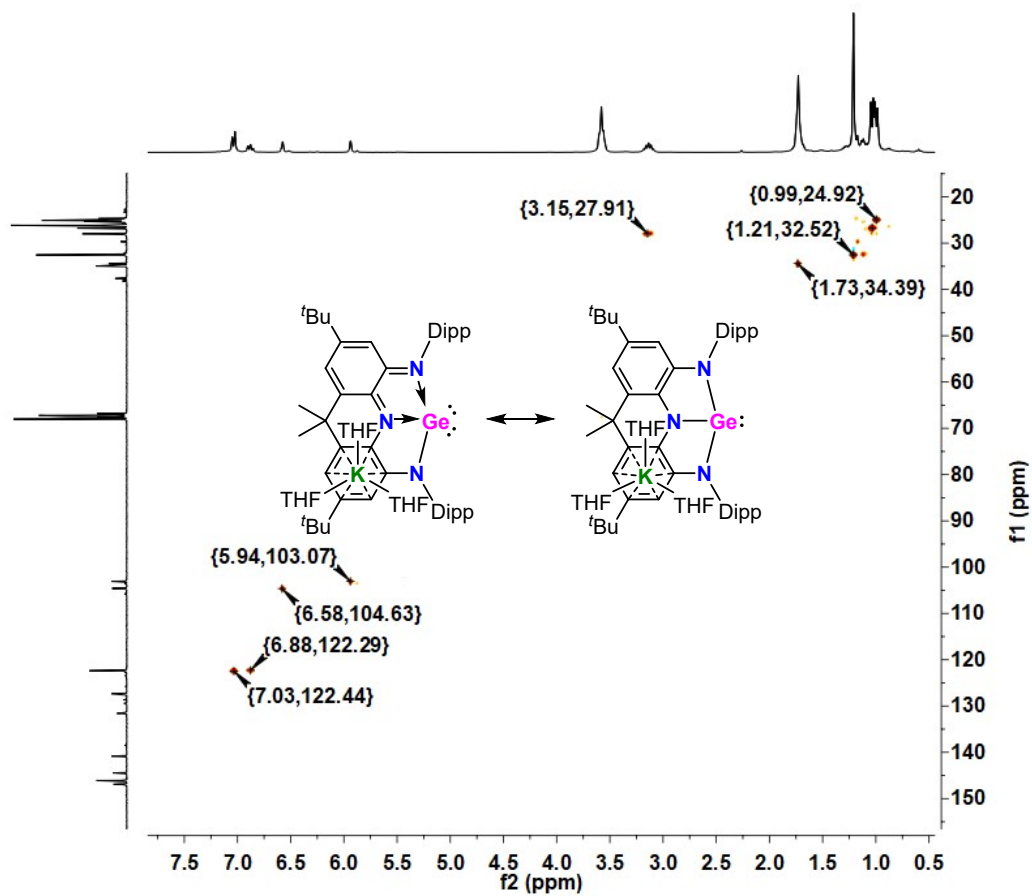

**Fig. S7** The HSQC spectrum of 4 in THF-D<sub>8</sub> at 298 K.

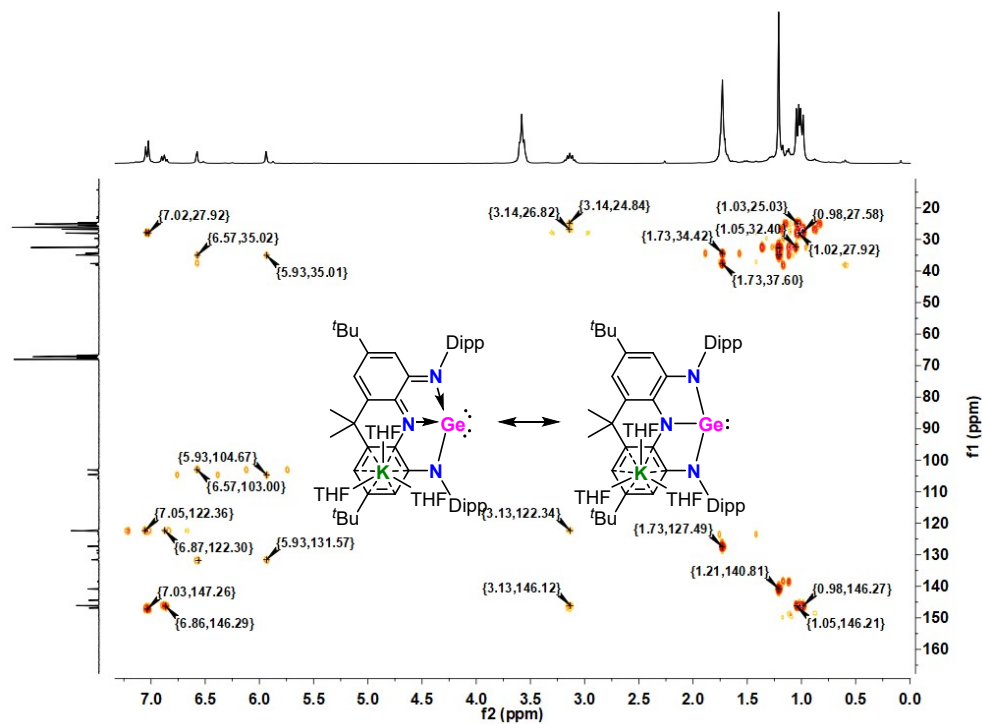

**Fig. S8** The HMBC spectrum of 4 in THF-D<sub>8</sub> at 298 K.

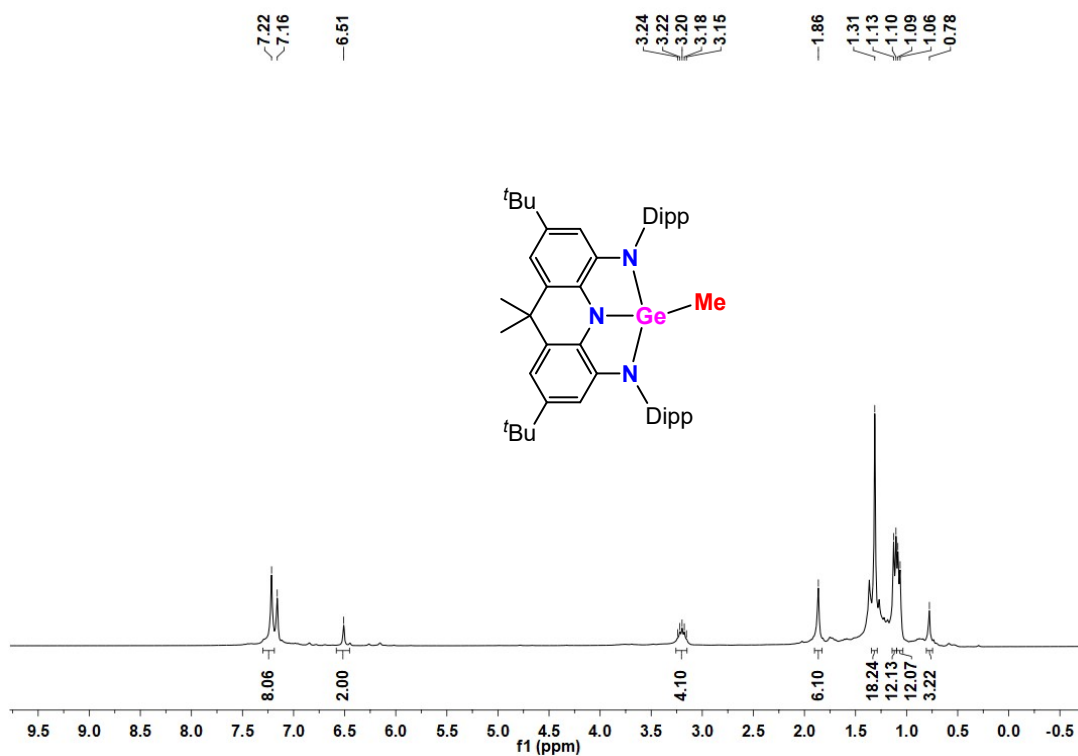

Fig. S9  $^1\text{H}$  NMR spectrum of **5** in  $\text{C}_6\text{D}_6$  at 298 K.

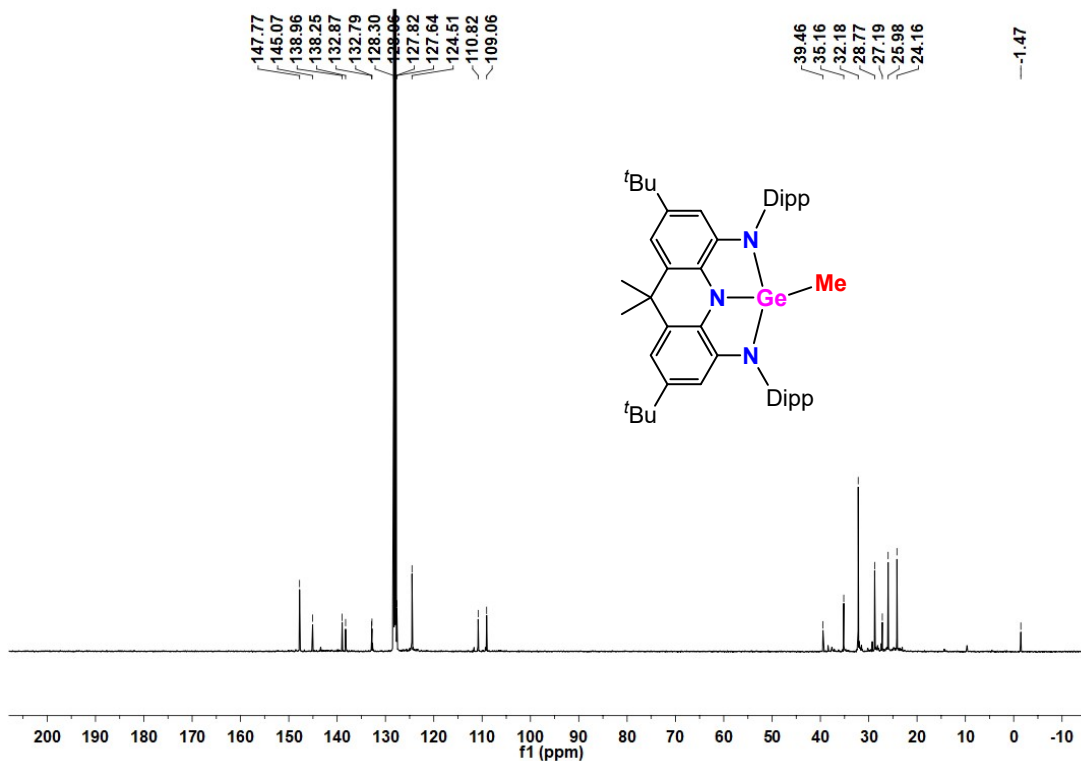

Fig. S10  $^{13}\text{C}\{^1\text{H}\}$  NMR spectrum of **5** in  $\text{C}_6\text{D}_6$  at 298 K.

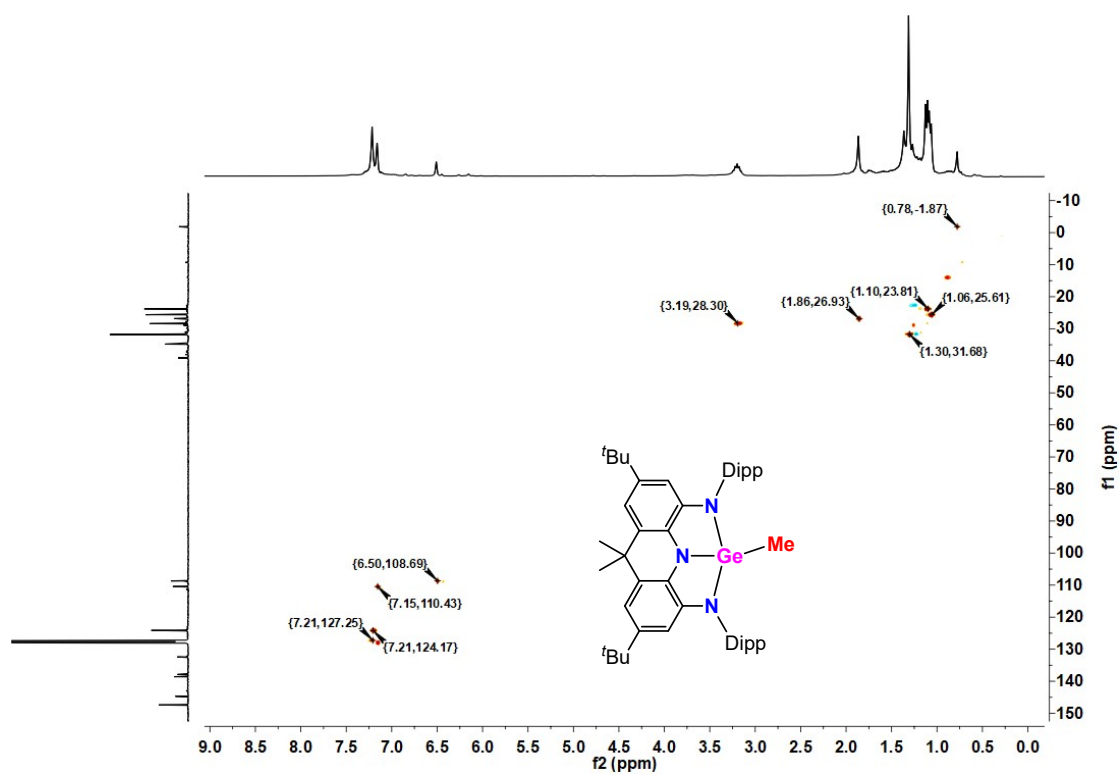

**Fig. S11** The HSQC spectrum of **5** in  $C_6D_6$  at 298 K.

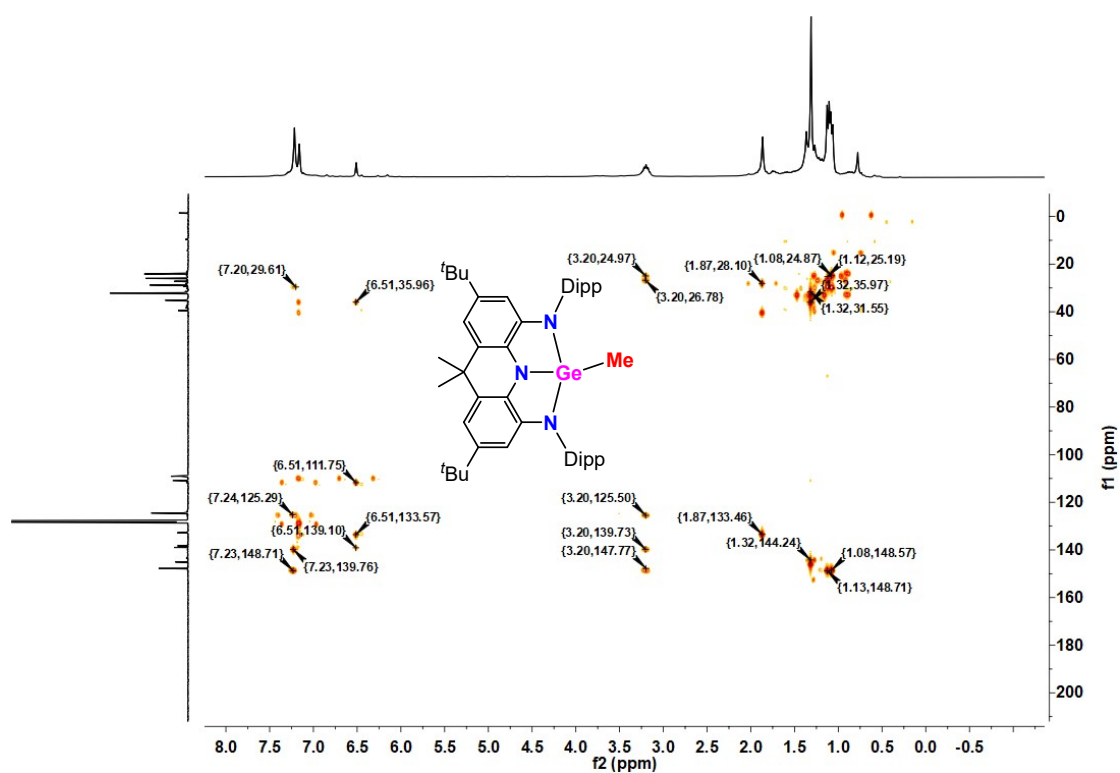

**Fig. S12** The HMBC spectrum of **5** in  $C_6D_6$  at 298 K.

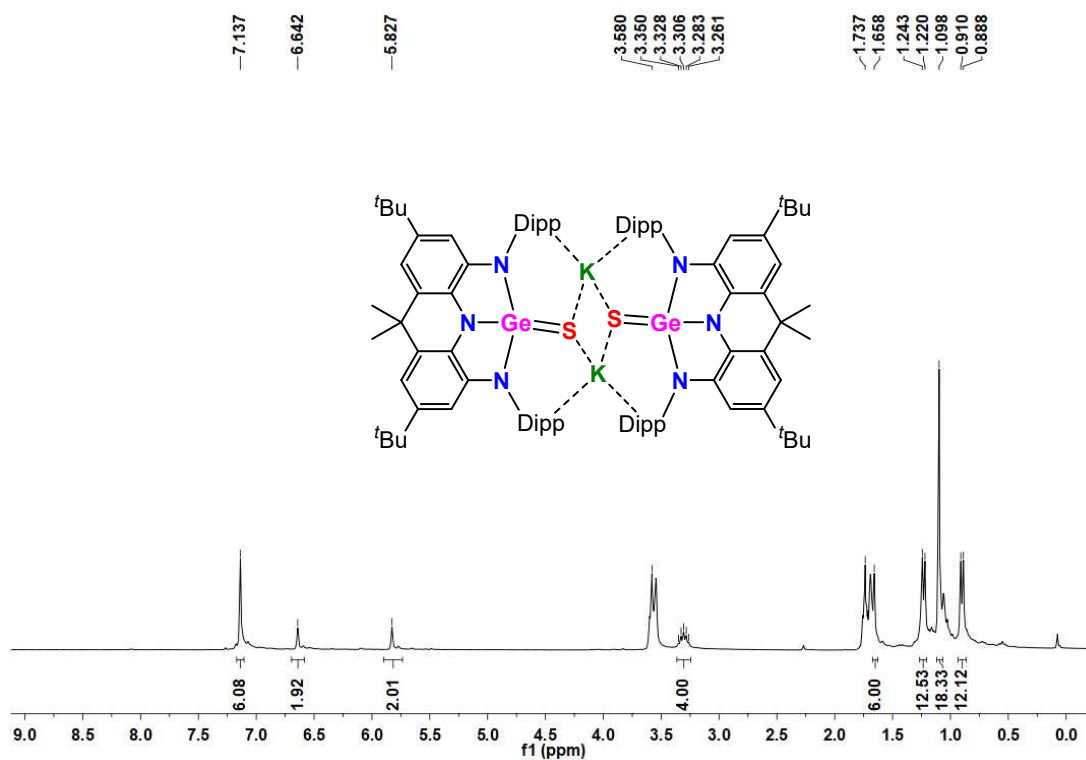

**Fig. S13**  $^1\text{H}$  NMR spectrum of **6** in THF- $\text{D}_8$  at 298 K.

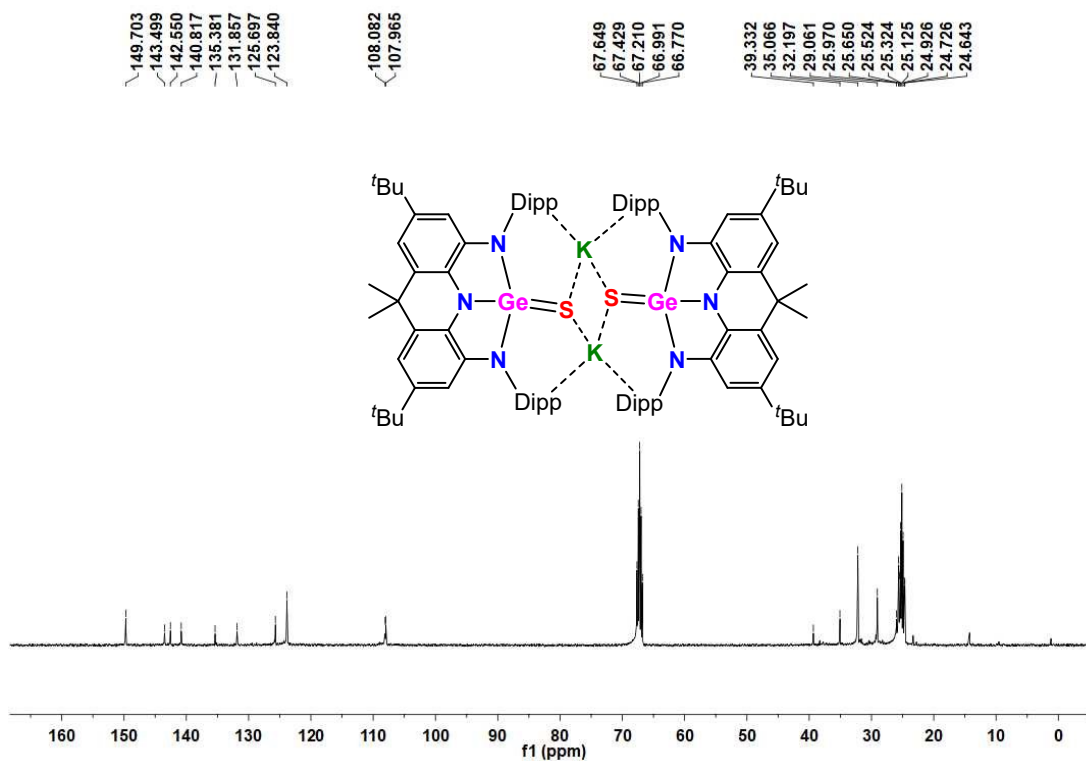

**Fig. S14**  $^{13}\text{C}\{^1\text{H}\}$  NMR spectrum of **6** in THF- $\text{D}_8$  at 298 K.

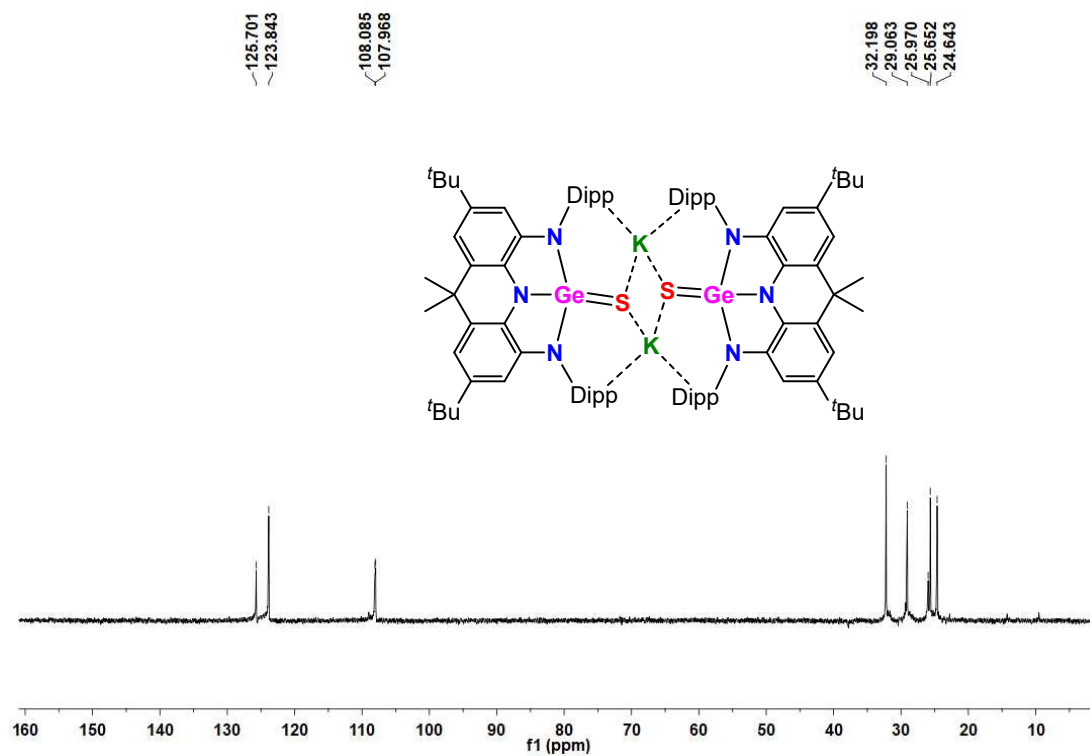

**Fig. S15**  $^{13}\text{C}$ (DEPT135) NMR spectrum of **6** in THF- $\text{D}_8$  at 298 K.

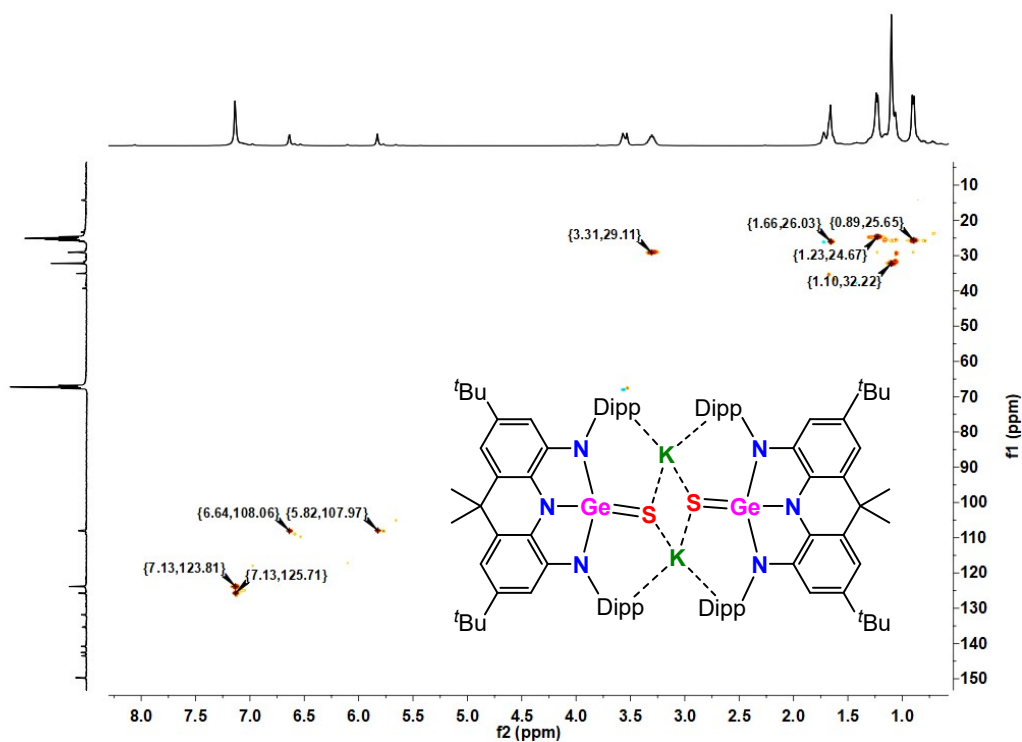

**Fig. S16** The HSQC spectrum of **6** in THF- $\text{D}_8$  at 298 K.

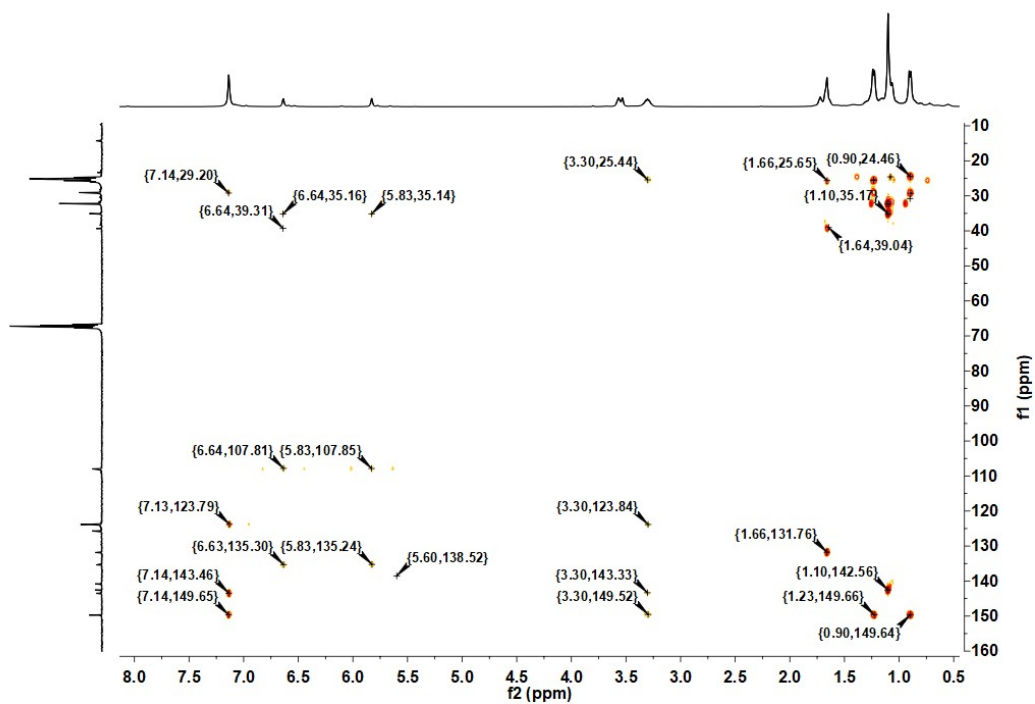

**Fig. S17** The HMBC spectrum of **6** in THF-D<sub>8</sub> at 298 K.

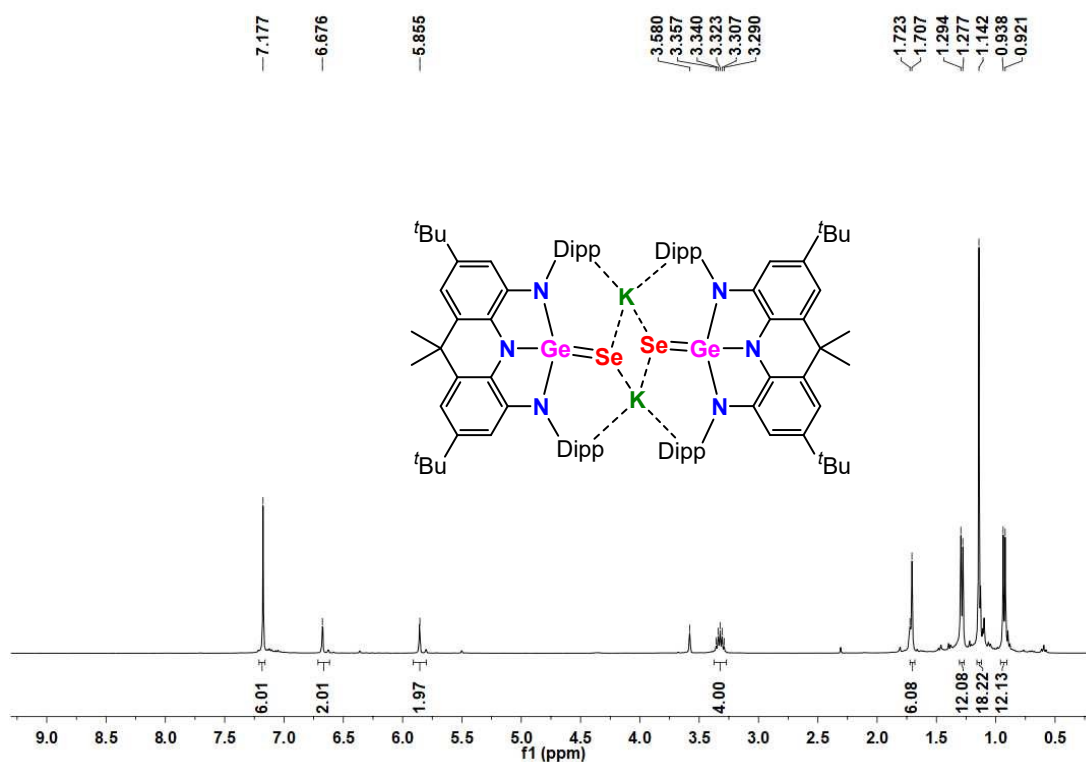

**Fig. S18** <sup>1</sup>H NMR spectrum of **7** in THF-D<sub>8</sub> at 298 K.



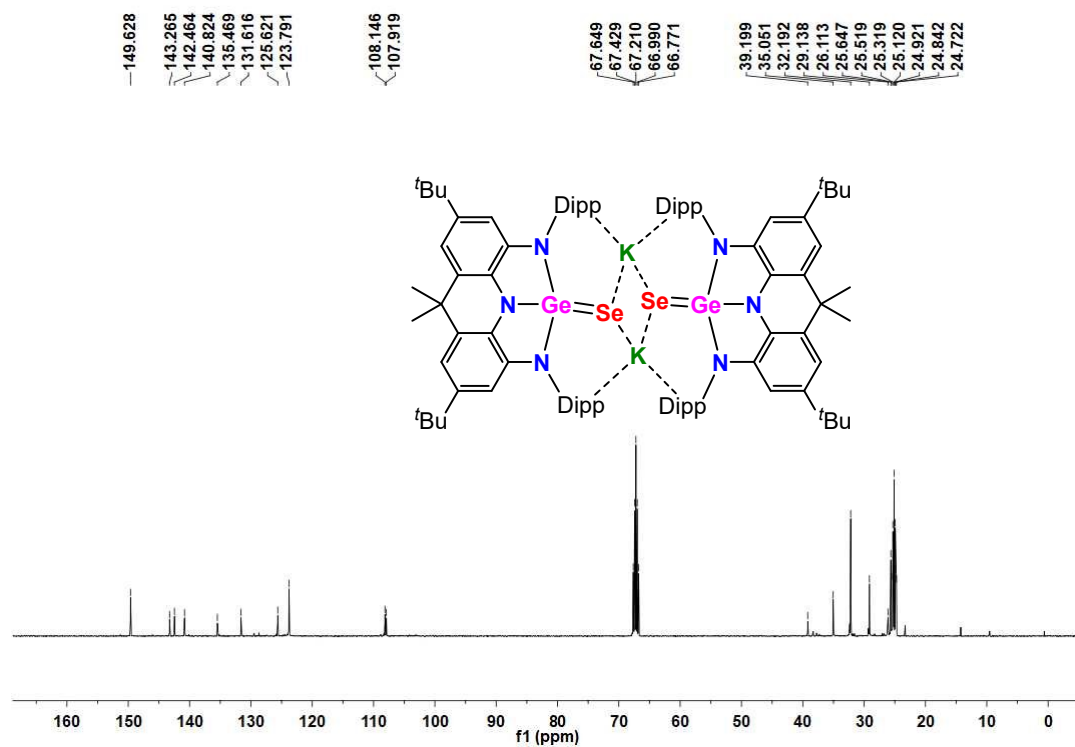

**Fig. S19**  $^{13}\text{C}\{^1\text{H}\}$  NMR spectrum of **7** in THF- $\text{D}_8$  at 298 K.

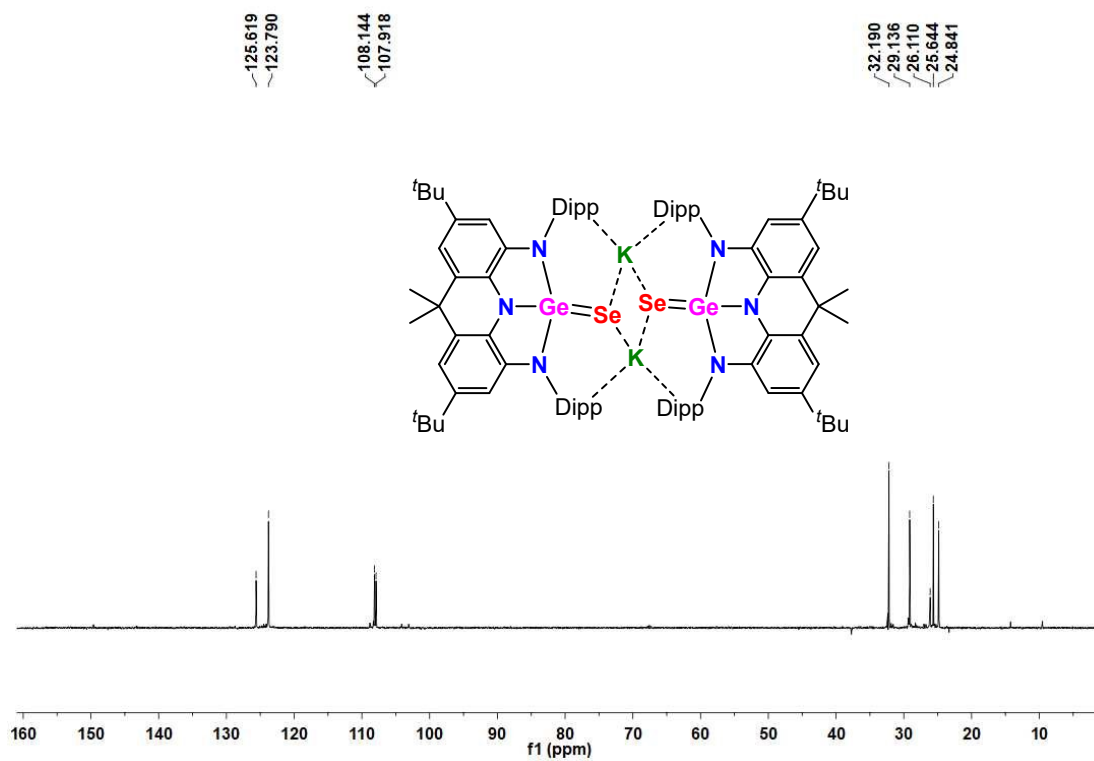

**Fig. S20**  $^{13}\text{C}(\text{DEPT}135)$  NMR spectrum of **7** in THF- $\text{D}_8$  at 298 K.

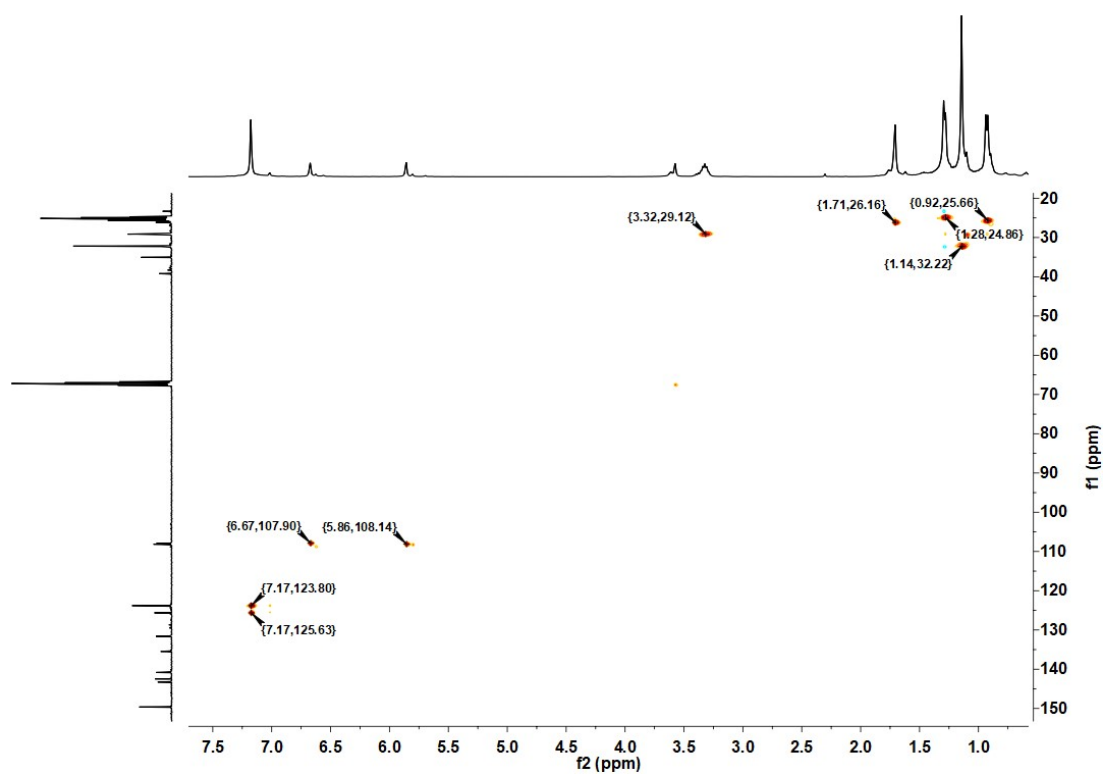

**Fig. S21** The HSQC spectrum of **7** in THF-D<sub>8</sub> at 298 K.

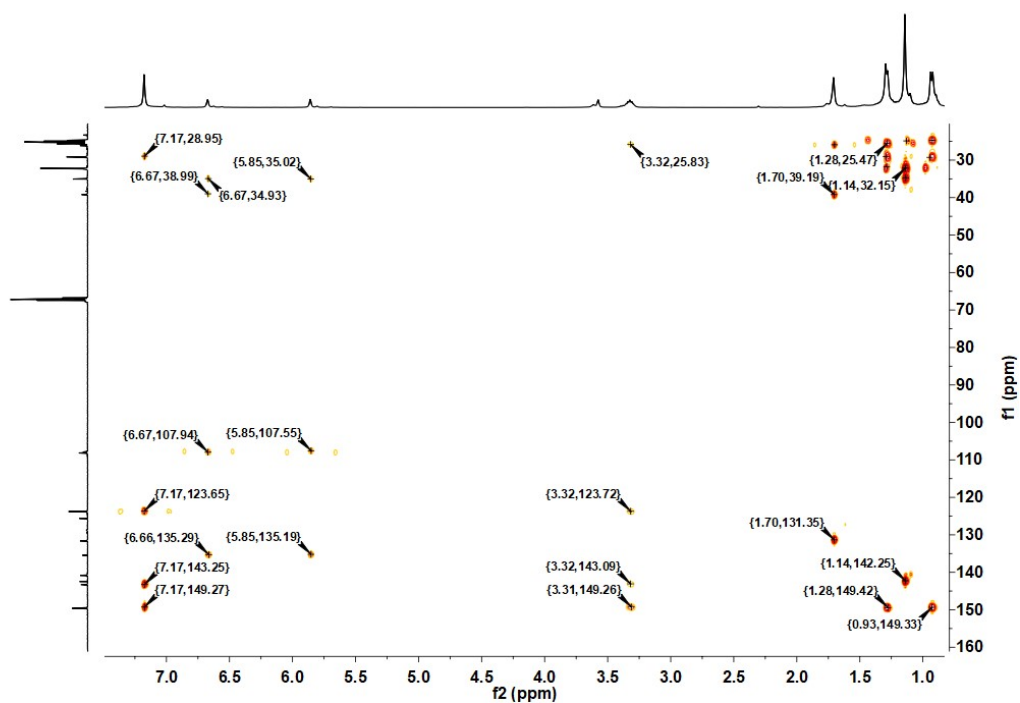

**Fig. S22** The HMBC spectrum of **7** in THF-D<sub>8</sub> at 298 K.

—271.93

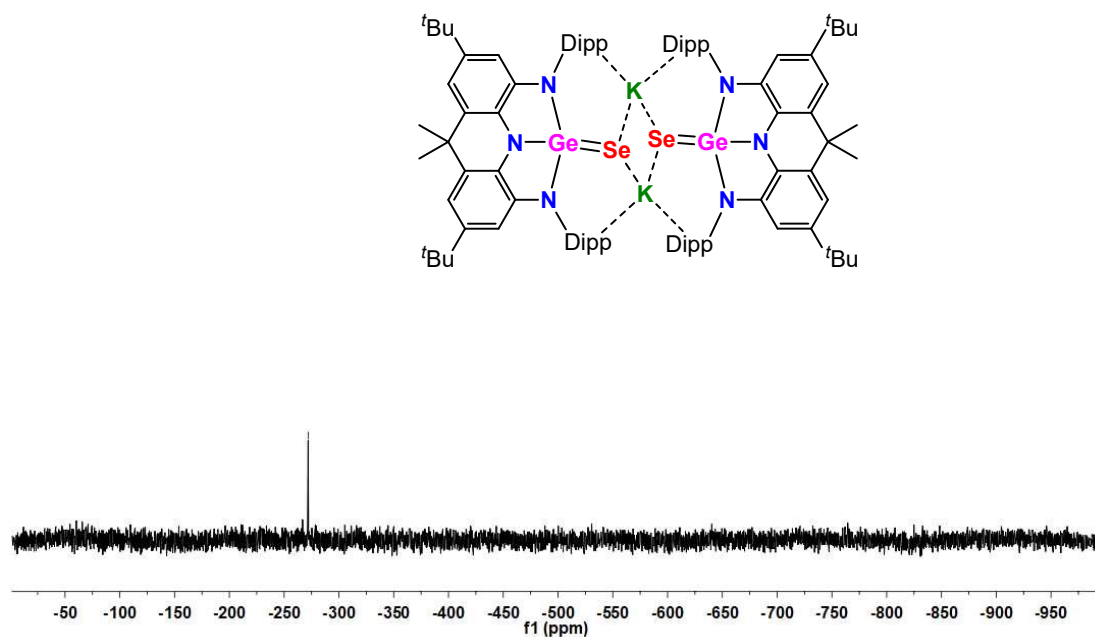

**Fig. S23**  $^{77}\text{Se}\{^1\text{H}\}$  NMR spectrum of 7 in THF- $\text{D}_8$  at 298 K.

## 2. Crystal structural parameters

For the single crystal X-ray structure analyses the crystals were each mounted on a glass capillary in perfluorinated oil and measured in a cold  $\text{N}_2$  flow. The data for all compounds were collected on a Bruker D8 CMOS detector at low temperatures. The structures were solved by direct methods and all refined on  $F^2$  with the SHELX-2018/3 software package. The positions of the H atoms were calculated and considered isotropically according to a riding model.

**Table S1.** Summary of data collection and structure refinement.

| Compounds                                  | <b>2</b>                                                               | <b>3</b>                                                         | <b>4</b>                                                         |
|--------------------------------------------|------------------------------------------------------------------------|------------------------------------------------------------------|------------------------------------------------------------------|
| CCDC                                       | 2201768                                                                | 2121988                                                          | 2121989                                                          |
| Formula                                    | C <sub>108.28</sub> H <sub>157.32</sub> Li <sub>6</sub> N <sub>6</sub> | C <sub>47</sub> H <sub>62</sub> Cl <sub>2</sub> GeN <sub>3</sub> | C <sub>59</sub> H <sub>86</sub> GeKN <sub>3</sub> O <sub>3</sub> |
| Fw                                         | 1584.71                                                                | 812.554                                                          | 997.07                                                           |
| Crystal syst                               | monoclinic                                                             | monoclinic                                                       | monoclinic                                                       |
| Space group                                | P2 <sub>1</sub> /n                                                     | C2/c                                                             | P2 <sub>1</sub> /n                                               |
| Size, mm <sup>3</sup>                      | 0.10 × 0.08 × 0.08                                                     | 0.15 × 0.12 × 0.11                                               | 0.12 × 0.11 × 0.10                                               |
| T, K                                       | 120                                                                    | 120.06                                                           | 120.00                                                           |
| <i>a</i> , Å                               | 14.4571(7)                                                             | 31.6991(18)                                                      | 11.0177(7)                                                       |
| <i>b</i> , Å                               | 42.796(2)                                                              | 18.5153(9)                                                       | 21.7711(13)                                                      |
| <i>c</i> , Å                               | 15.4362(9)                                                             | 15.1604(8)                                                       | 24.2953(16)                                                      |
| $\alpha$ , deg                             | 90                                                                     | 90                                                               | 90                                                               |
| $\beta$ , deg                              | 94.595(3)                                                              | 94.550(2)                                                        | 92.991(3)                                                        |
| $\gamma$ , deg                             | 90                                                                     | 90                                                               | 90                                                               |
| V, Å <sup>3</sup>                          | 9519.8(9)                                                              | 8869.9(8)                                                        | 5819.7(6)                                                        |
| Z                                          | 4                                                                      | 8                                                                | 4                                                                |
| $d_{calc}$ , g•cm <sup>-1</sup>            | 1.106                                                                  | 1.217                                                            | 1.138                                                            |
| $\mu$ , mm <sup>-1</sup>                   | 0.296                                                                  | 0.846                                                            | 1.109                                                            |
| Reflections collected                      | 103054                                                                 | 50335                                                            | 79713                                                            |
| Independent reflections                    | 17456                                                                  | 8708                                                             | 10641                                                            |
| [R <sub>int</sub> ]                        | 0.0861                                                                 | 0.0598                                                           | 0.0847                                                           |
| R <sub>1</sub> [I > 2 $\sigma$ (I)]        | 0.0639                                                                 | 0.0428                                                           | 0.0492                                                           |
| wR <sub>2</sub> [I > 2 $\sigma$ (I)]       | 0.1761                                                                 | 0.1101                                                           | 0.1344                                                           |
| R <sub>1</sub> [all data]                  | 0.0975                                                                 | 0.0535                                                           | 0.0589                                                           |
| wR <sub>2</sub> [all data]                 | 0.1958                                                                 | 0.1172                                                           | 0.1407                                                           |
| GOF                                        | 1.048                                                                  | 1.0575                                                           | 1.026                                                            |
| Largest diff. Peak/hole, e•Å <sup>-3</sup> | 0.27/-0.22                                                             | 0.41/-0.33                                                       | 0.61/-0.51                                                       |

| Compounds                                   | <b>5·0.5C<sub>6</sub>H<sub>14</sub></b>          | <b>6</b>                                                                                                      | <b>7</b>                                                                                                       |
|---------------------------------------------|--------------------------------------------------|---------------------------------------------------------------------------------------------------------------|----------------------------------------------------------------------------------------------------------------|
| CCDC                                        | 2201769                                          | 2121991                                                                                                       | 2121990                                                                                                        |
| Formula                                     | C <sub>51</sub> H <sub>72</sub> GeN <sub>3</sub> | C <sub>108</sub> H <sub>154</sub> Ge <sub>2</sub> K <sub>2</sub> N <sub>6</sub> O <sub>2</sub> S <sub>2</sub> | C <sub>114</sub> H <sub>168</sub> Ge <sub>2</sub> K <sub>2</sub> N <sub>6</sub> O <sub>2</sub> Se <sub>2</sub> |
| Fw                                          | 799.70                                           | 1856.02                                                                                                       | 2035.985                                                                                                       |
| Crystal syst                                | triclinic                                        | triclinic                                                                                                     | triclinic                                                                                                      |
| Space group                                 | P-1                                              | P-1                                                                                                           | P-1                                                                                                            |
| Size, mm <sup>3</sup>                       | 0.14 × 0.13 × 0.12                               | 0.15 × 0.13 × 0.12                                                                                            | 0.18 × 0.16 × 0.08                                                                                             |
| T, K                                        | 120                                              | 120                                                                                                           | 135.00                                                                                                         |
| <i>a</i> , Å                                | 12.7334(7)                                       | 14.1535                                                                                                       | 14.292(8)                                                                                                      |
| <i>b</i> , Å                                | 13.204(3)                                        | 14.2181                                                                                                       | 14.502(8)                                                                                                      |
| <i>c</i> , Å                                | 14.3960(6)                                       | 15.1396                                                                                                       | 15.149(9)                                                                                                      |
| $\alpha$ , deg                              | 98.596(5)                                        | 79.781                                                                                                        | 70.44(2)                                                                                                       |
| $\beta$ , deg                               | 101.664(3)                                       | 70.505                                                                                                        | 79.46(2)                                                                                                       |
| $\gamma$ , deg                              | 96.759(6)                                        | 68.035                                                                                                        | 67.63(2)                                                                                                       |
| V, Å <sup>3</sup>                           | 2316.3(5)                                        | 2658.7                                                                                                        | 2730(3)                                                                                                        |
| Z                                           | 2                                                | 1                                                                                                             | 1                                                                                                              |
| <i>d<sub>calcd</sub></i> g•cm <sup>-1</sup> | 1.147                                            | 1.159                                                                                                         | 1.238                                                                                                          |
| $\mu$ , mm <sup>-1</sup>                    | 0.754                                            | 1.410                                                                                                         | 1.655                                                                                                          |
| Reflections collected                       | 37828                                            | 7688                                                                                                          | 8399                                                                                                           |
| Independent reflections                     | 8363                                             | 9573                                                                                                          | 9641                                                                                                           |
| [R <sub>int</sub> ]                         | 0.0424                                           | 0.0649                                                                                                        | 0.0553                                                                                                         |
| R <sub>1</sub> [I>2sigma(I)]                | 0.0383                                           | 0.0591                                                                                                        | 0.0481                                                                                                         |
| wR <sub>2</sub> [I>2sigma(I)]               | 0.0995                                           | 0.1839                                                                                                        | 0.1435                                                                                                         |
| R <sub>1</sub> [all data]                   | 0.0398                                           | 0.0706                                                                                                        | 0.0540                                                                                                         |
| wR <sub>2</sub> [all data]                  | 0.1008                                           | 0.2003                                                                                                        | 0.1502                                                                                                         |
| GOF                                         | 1.054                                            | 1.035                                                                                                         | 1.053                                                                                                          |
| Largest diff. Peak/hole, e•Å <sup>-3</sup>  | 0.62/-0.37                                       | 0.48/-0.62                                                                                                    | 0.92/-0.52                                                                                                     |

### 3. EPR spectrum of 3

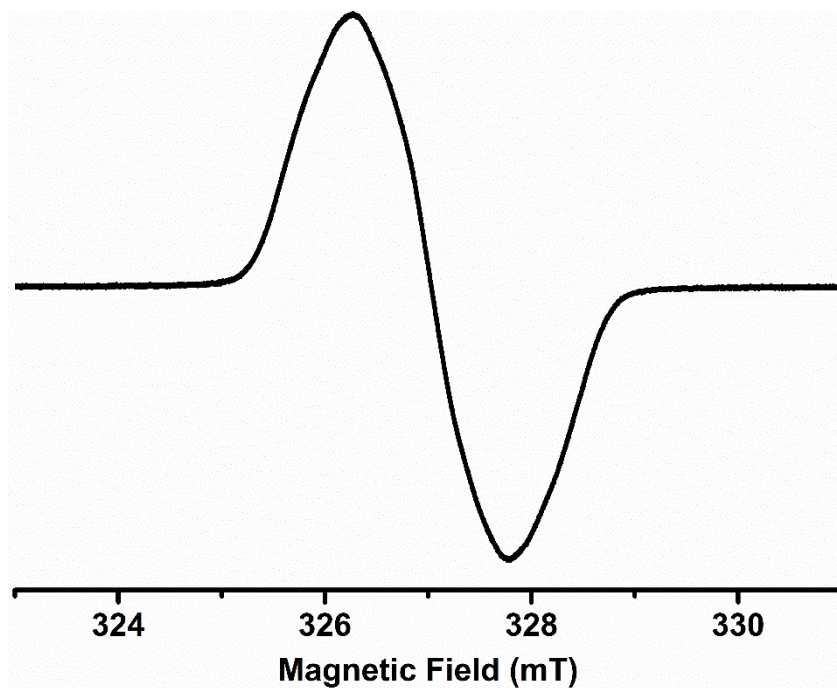

Fig. S24 EPR spectrum of **3** in hexane at room temperature

### 4. UV-vis spectra

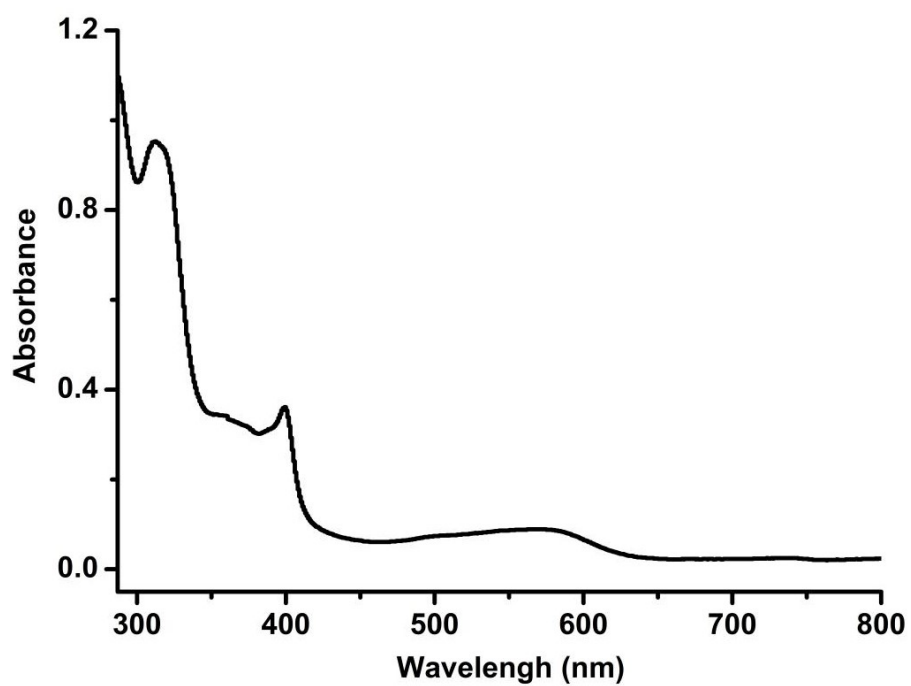

Fig. S25 UV-vis spectrum of **3** in toluene at room temperature.

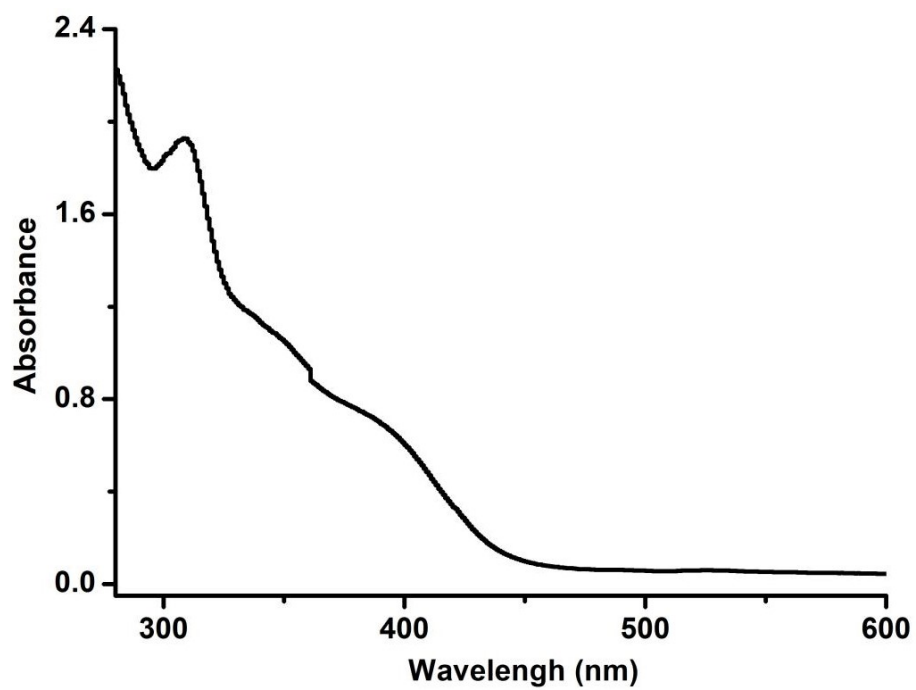

Fig. S26 UV-vis spectrum of **4** in THF at room temperature.

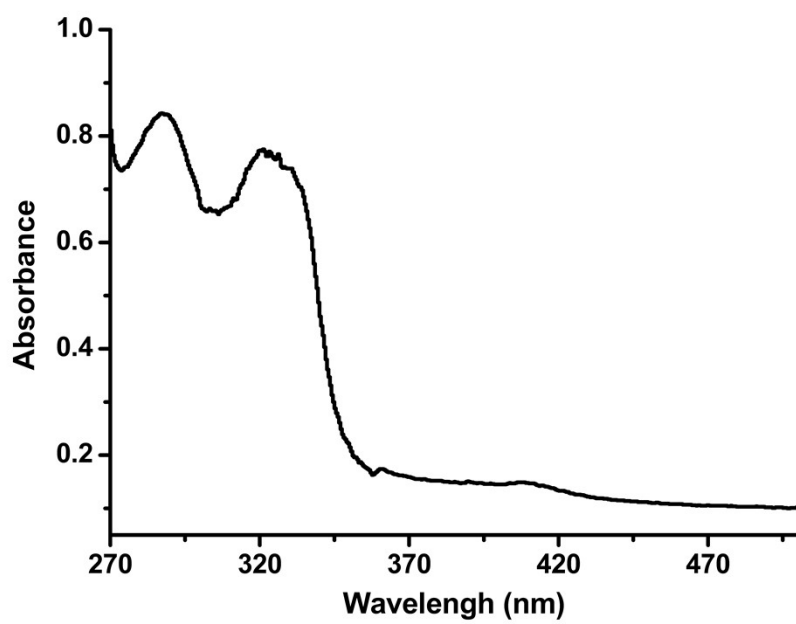

Fig. S27 UV-vis spectrum of **5** in THF at room temperature.

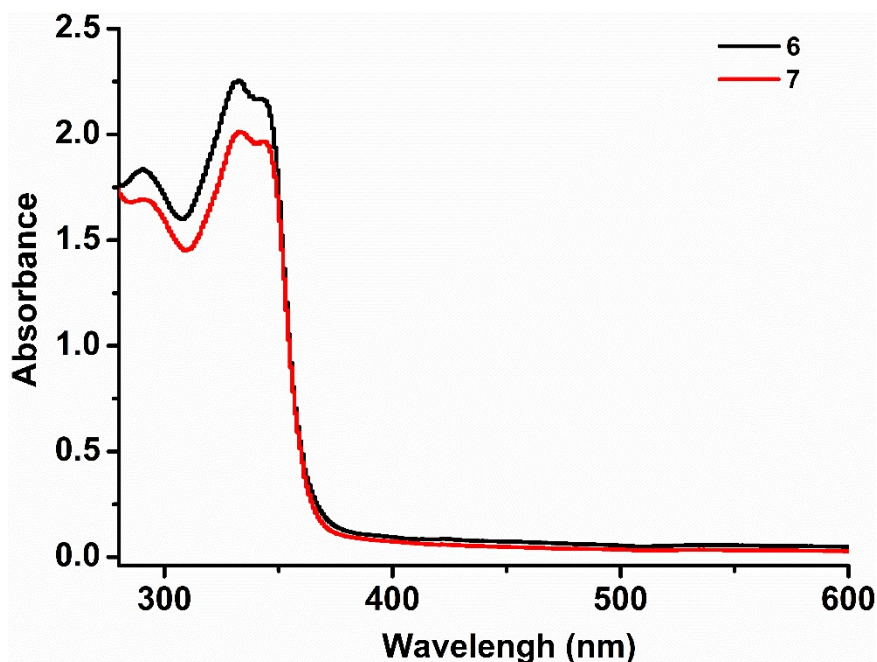

Fig. S28 UV-vis spectrum of **6** and **7** in THF at room temperature.

## 5. Theoretical calculations

All of the calculations were performed with the Gaussian 16 program.<sup>S2</sup> All of the geometry optimizations were performed at the (U)B3LYP-D3BJ/6-311G(d) level in consideration of the London dispersion and solvent correction.<sup>S3,S4</sup> The natural bond orbital (NBO) analysis<sup>S5</sup> was carried out at the same level. To further figure out the absorption properties of the anionic part of **4**, we also obtained the UV-vis spectrum at the time-dependent DFT (TDDFT)//B3LYP/6-311G(d) level,<sup>S6</sup> which agrees well with the experimental data, and the calculated Kohn-Sham orbitals related to the observed transitions are shown in Table S2 and S3.



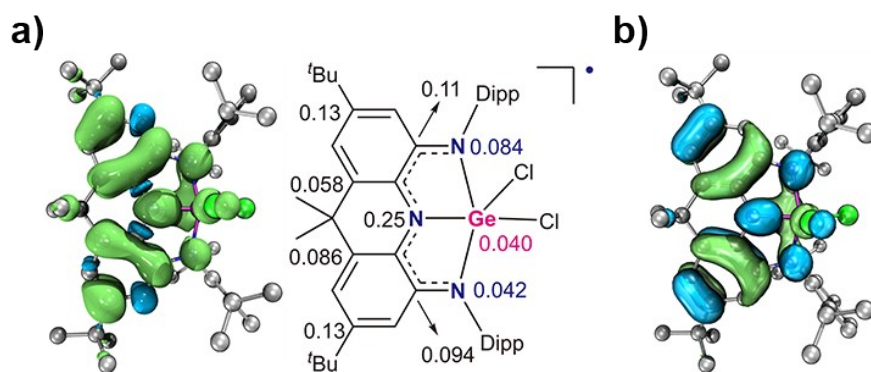

**Fig. S29** a) Spin density and b) SOMO of **2** calculated at the UB3LYP-D3BJ/6-311G(d) level.

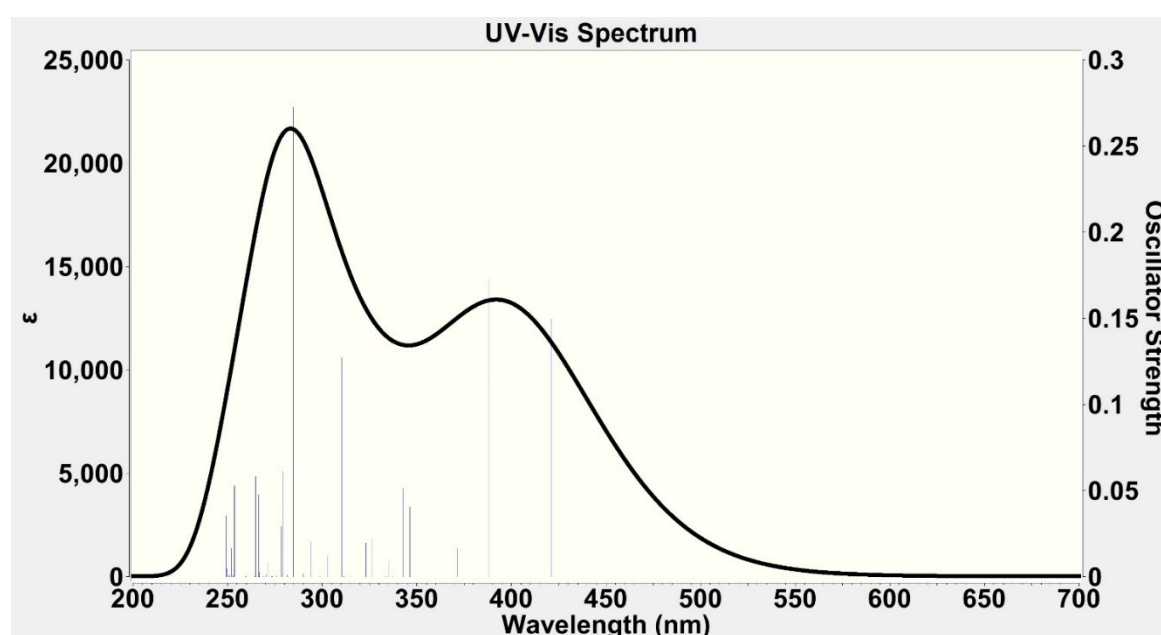

**Fig. S30** Calculated UV-vis spectrum of the anionic part of **4** at the time-dependent DFT (TDDFT)/B3LYP/6-311G(d) level.

**Table S2** Calculated absorption properties of the anionic part of **4** including wavelength (nm), oscillator strength ( $f$ ) and the related transition nature

| Energy / eV | Wavelength / nm | Oscillator strength / $f$ | Transition nature                             |
|-------------|-----------------|---------------------------|-----------------------------------------------|
| 2.9453      | 420.96          | 0.1497                    | HOMO-1→LUMO (0.66256)<br>HOMO→LUMO (-0.22026) |
| 3.1941      | 388.17          | 0.1727                    | HOMO-1→LUMO (0.21830)<br>HOMO→LUMO (0.65781)  |
| 3.9927      | 310.53          | 0.1272                    | HOMO→LUMO+5 (0.67687)                         |
| 4.3542      | 284.75          | 0.2724                    | HOMO-2→LUMO+3 (0.69946)                       |

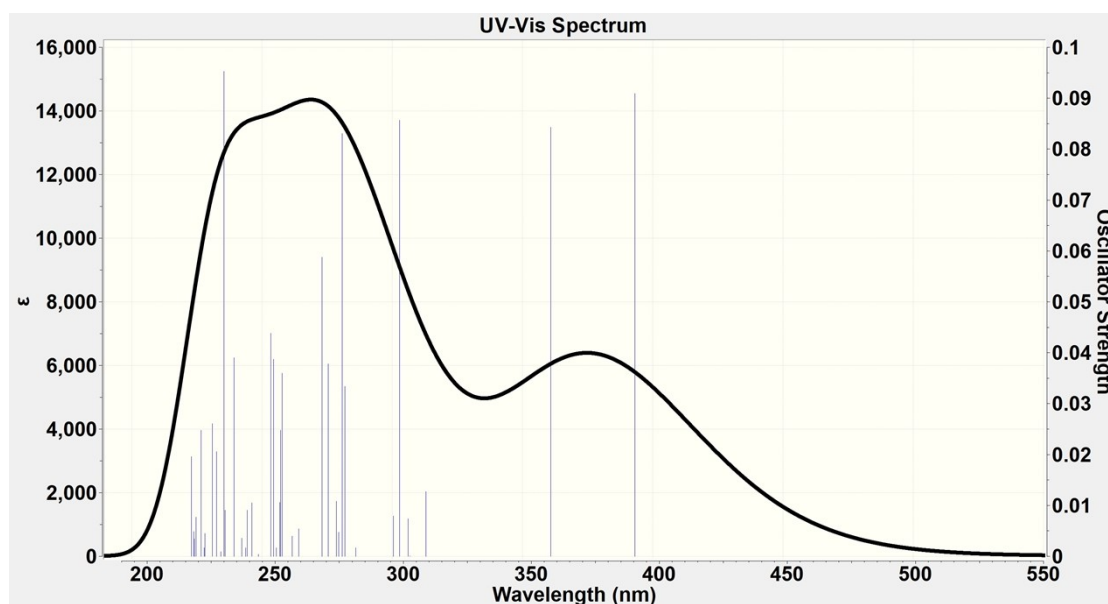

**Fig. 31** Calculated UV-vis spectrum of **5** at the time-dependent DFT (TDDFT)//B3LYP/6-311G(d) level.

**Table S3** Calculated absorption properties of **5** including wavelength (nm), oscillator strength ( $f$ ) and the related transition nature

| Energy / eV | Wavelength / nm | Oscillator strength / $f$ | Transition nature                                                                                      |
|-------------|-----------------|---------------------------|--------------------------------------------------------------------------------------------------------|
| 3.1541      | 393.09          | 0.0909                    | HOMO→LUMO (0.69604)                                                                                    |
| 3.4356      | 360.88          | 0.0843                    | HOMO-1→LUMO (0.69684)                                                                                  |
| 4.4149      | 280.83          | 0.0831                    | HOMO→LUMO+5 (0.54044)<br>HOMO→LUMO+6 (0.15389)                                                         |
| 4.8940      | 253.34          | 0.0438                    | HOMO-1→LUMO+5 (-0.22852)<br>HOMO-1→LUMO+6 (-2.20759)<br>HOMO-6→LUMO (0.47857)<br>HOMO→LUMO+7 (0.23136) |

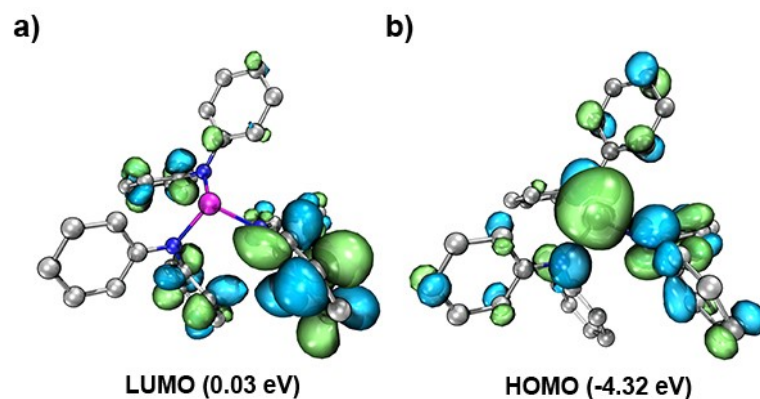

**Fig. S32** a) LUMO and b) HOMO of  $[\text{Ge}(\text{NPh}_2)_3]^-$  calculated at the B3LYP-D3BJ/6-311G(d) level in consideration of solvent(THF) correction.

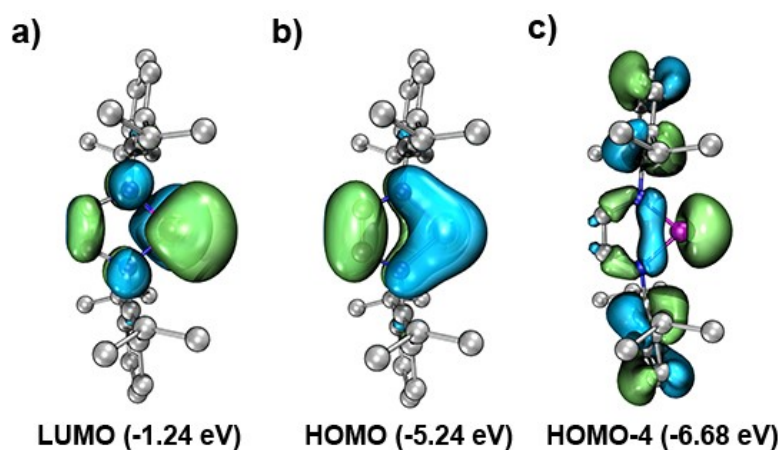

**Fig. S33** a) LUMO, b) HOMO, and c) HOMO-1 of  $[(\text{DippNCH})_2\text{Ge}:]$  calculated at the B3LYP-D3BJ/6-311G(d) level in consideration of solvent(THF) correction.

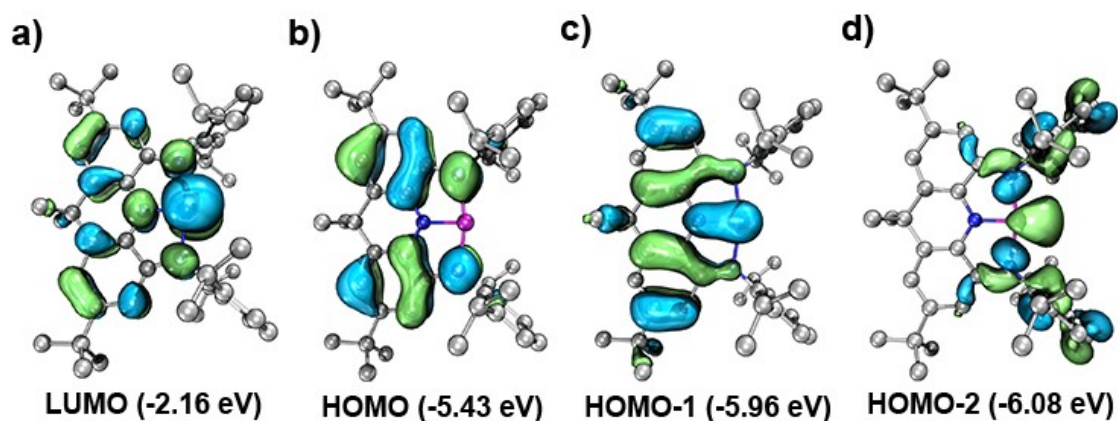

**Fig. S34** a) LUMO, b) HOMO, c) HOMO-1, and HOMO-2 of  $^{\text{NNN}}\text{LP}$  calculated at the B3LYP/6-311G(d) level with DFT-D3BJ and THF solvation-corrected..

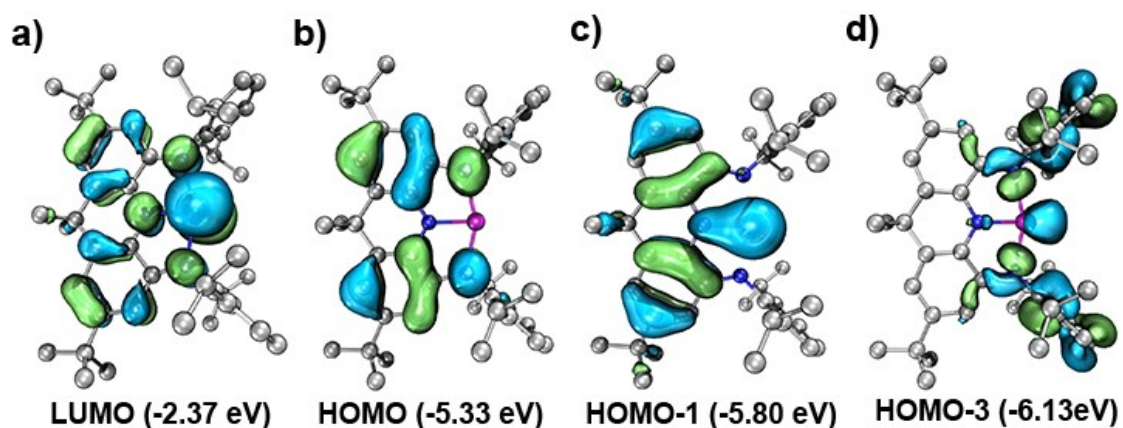

**Fig. S35** a) LUMO, b) HOMO, c) HOMO-1, and d) HOMO-3 of <sup>NNN</sup>LAs calculated at the B3LYP/6-311G(d) level with DFT-D3BJ and THF solvation-corrected..

### Coordinates of the studied molecules

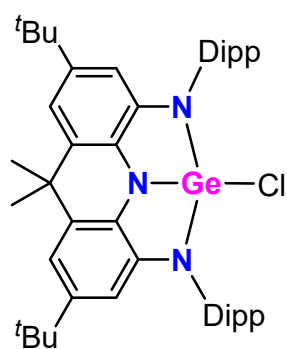

|    |             |             |             |
|----|-------------|-------------|-------------|
| Ge | -0.00315600 | -1.14484400 | 0.08062800  |
| Cl | -0.02533400 | -2.90503900 | -1.30378700 |
| N  | 2.02681800  | -0.80254500 | -0.21987400 |
| N  | -2.02098200 | -0.78060000 | -0.17768600 |
| N  | 0.00700100  | 0.71569500  | -0.52421000 |
| C  | 2.30863500  | 0.51930700  | -0.22649700 |
| C  | 3.56427700  | 1.13143900  | 0.00394900  |
| H  | 4.41598400  | 0.49103700  | 0.17731700  |
| C  | 3.68956400  | 2.50655200  | -0.03125000 |
| C  | 2.53551400  | 3.31375900  | -0.25402100 |
| H  | 2.65701100  | 4.38843800  | -0.26771300 |
| C  | 1.28215100  | 2.77337700  | -0.45675300 |
| C  | 1.19007200  | 1.36843000  | -0.45781200 |
| C  | -2.29275500 | 0.54579400  | -0.18393700 |
| C  | -3.53487900 | 1.17150300  | 0.04984500  |

|   |             |            |             |
|---|-------------|------------|-------------|
| H | -4.39616800 | 0.54423000 | 0.23596900  |
| C | -3.65322700 | 2.55197700 | -0.00720700 |
| C | -2.49946200 | 3.34451300 | -0.24391700 |
| H | -2.60410300 | 4.41853900 | -0.27204200 |
| C | -1.24824000 | 2.78549700 | -0.44496700 |
| C | -1.16891800 | 1.38439700 | -0.43505000 |
| C | 0.01935500  | 3.58970000 | -0.78260100 |
| C | 0.02979600  | 4.93929000 | -0.04945800 |
| H | 0.03671200  | 4.80008100 | 1.03330000  |
| H | -0.84396400 | 5.53650600 | -0.31354300 |
| H | 0.90459500  | 5.52963200 | -0.32597600 |
| C | 0.01424300  | 3.84039500 | -2.31341400 |
| H | 0.90489800  | 4.40010800 | -2.61065700 |
| H | -0.87368900 | 4.40822600 | -2.60303900 |
| H | 0.00747800  | 2.89656000 | -2.86240500 |
| C | 5.04108900  | 3.20229200 | 0.16738000  |
| C | 6.18486300  | 2.20237400 | 0.39114300  |
| H | 6.31103300  | 1.52954800 | -0.46051100 |
| H | 6.02692700  | 1.59365300 | 1.28477600  |
| H | 7.12515400  | 2.74253400 | 0.52539000  |
| C | 4.96045800  | 4.12540900 | 1.40107500  |
| H | 5.91740200  | 4.63035800 | 1.56147600  |
| H | 4.72445800  | 3.55149800 | 2.30077000  |
| H | 4.19487400  | 4.89578200 | 1.28812400  |
| C | 5.37422400  | 4.04063200 | -1.08412000 |
| H | 6.34034700  | 4.53895000 | -0.96259600 |
| H | 4.62527300  | 4.81283000 | -1.27158400 |
| H | 5.42874900  | 3.40697800 | -1.97290100 |
| C | -5.04235000 | 3.18523500 | 0.16791000  |
| C | -5.95379900 | 2.71565600 | -0.98509900 |
| H | -6.94989000 | 3.15818400 | -0.89058600 |
| H | -6.06902400 | 1.63014000 | -0.99122800 |
| H | -5.54135100 | 3.01082300 | -1.95337500 |
| C | -5.65040000 | 2.73911700 | 1.51316500  |
| H | -5.01144900 | 3.03569300 | 2.34889700  |
| H | -5.78290500 | 1.65697700 | 1.56222800  |
| H | -6.63289200 | 3.19773400 | 1.65710600  |
| C | -4.99890000 | 4.72066700 | 0.15190900  |

|   |             |             |             |
|---|-------------|-------------|-------------|
| H | -6.00660300 | 5.11765000  | 0.29596900  |
| H | -4.62933600 | 5.11060800  | -0.79989600 |
| H | -4.37168200 | 5.12006400  | 0.95326800  |
| C | 3.04549700  | -1.73643200 | 0.12658700  |
| C | 3.41919100  | -1.92975800 | 1.47017700  |
| C | 4.41801000  | -2.86615500 | 1.74793000  |
| H | 4.71490400  | -3.03945400 | 2.77694400  |
| C | 5.03678000  | -3.57877800 | 0.72962700  |
| H | 5.81226800  | -4.30038700 | 0.96560100  |
| C | 4.66174700  | -3.36766900 | -0.59229500 |
| H | 5.15384200  | -3.92502900 | -1.38123200 |
| C | 3.66217800  | -2.45152600 | -0.91891700 |
| C | 2.76056700  | -1.17495500 | 2.61394000  |
| H | 2.03853900  | -0.47516400 | 2.18965300  |
| C | 3.77582600  | -0.34631800 | 3.41465900  |
| H | 4.52348000  | -0.98087800 | 3.89831300  |
| H | 3.27000100  | 0.22475000  | 4.19857500  |
| H | 4.30132200  | 0.36123600  | 2.77007300  |
| C | 1.98176600  | -2.13331400 | 3.52699700  |
| H | 1.24902300  | -2.70807500 | 2.95729900  |
| H | 1.44673100  | -1.57978800 | 4.30395100  |
| H | 2.64880900  | -2.84427400 | 4.02220000  |
| C | 3.29833800  | -2.17334500 | -2.36694800 |
| H | 2.31629700  | -1.70054900 | -2.36517000 |
| C | 3.19114500  | -3.44630700 | -3.21301100 |
| H | 4.15986900  | -3.93554400 | -3.35081000 |
| H | 2.80737500  | -3.20383900 | -4.20770200 |
| H | 2.50755200  | -4.16344800 | -2.75500500 |
| C | 4.29406500  | -1.17595000 | -2.98373700 |
| H | 4.32105600  | -0.24089300 | -2.41933700 |
| H | 4.01469600  | -0.93841700 | -4.01462100 |
| H | 5.30727700  | -1.58971800 | -2.99633200 |
| C | -3.05141000 | -1.70584100 | 0.15632700  |
| C | -3.70254500 | -2.37301400 | -0.90005200 |
| C | -4.72176600 | -3.27152400 | -0.58489900 |
| H | -5.24093100 | -3.79116900 | -1.38231300 |
| C | -5.08143600 | -3.51370300 | 0.73593900  |
| H | -5.87269500 | -4.22109600 | 0.96250900  |

|   |             |             |             |
|---|-------------|-------------|-------------|
| C | -4.42557300 | -2.85183200 | 1.76523300  |
| H | -4.70868600 | -3.05107800 | 2.79341800  |
| C | -3.40677200 | -1.93362600 | 1.49925300  |
| C | -3.34854200 | -2.07022800 | -2.34582200 |
| H | -2.36197100 | -1.60680300 | -2.34365900 |
| C | -4.33937400 | -1.05414400 | -2.93919400 |
| H | -4.06672200 | -0.80500500 | -3.96915200 |
| H | -4.35183500 | -0.12672900 | -2.36231700 |
| H | -5.35693600 | -1.45722500 | -2.94912500 |
| C | -3.25924300 | -3.33023800 | -3.21366500 |
| H | -2.57708900 | -4.05991700 | -2.77379300 |
| H | -2.88324600 | -3.07467000 | -4.20810400 |
| H | -4.23314000 | -3.80961800 | -3.34946700 |
| C | -2.70202300 | -1.23932100 | 2.65341000  |
| H | -1.98601300 | -0.52903200 | 2.23634500  |
| C | -1.90604300 | -2.25027000 | 3.49203700  |
| H | -2.56683700 | -2.97648400 | 3.97337500  |
| H | -1.33739600 | -1.74273600 | 4.27633100  |
| H | -1.20128900 | -2.80616400 | 2.87018800  |
| C | -3.67660100 | -0.43630300 | 3.52660500  |
| H | -4.21337200 | 0.30774700  | 2.93528500  |
| H | -3.13516700 | 0.09042300  | 4.31780800  |
| H | -4.41634800 | -1.08207200 | 4.00767300  |

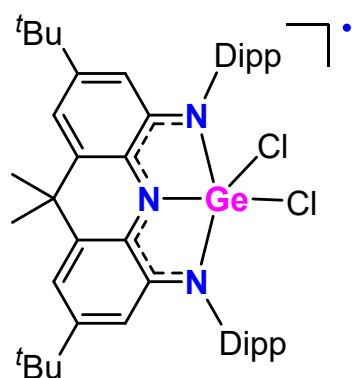

|    |             |             |             |
|----|-------------|-------------|-------------|
| Ge | 0.01322700  | -1.04366400 | -0.55095100 |
| Cl | 0.02540600  | -3.12837700 | 0.19182200  |
| Cl | -0.01890800 | -1.30251600 | -2.74035600 |
| N  | -1.89826700 | -0.70760400 | -0.10312900 |

|   |             |             |             |
|---|-------------|-------------|-------------|
| N | 1.90436800  | -0.68485400 | -0.13560600 |
| N | -0.00801200 | 0.90728400  | -0.49473700 |
| C | -2.25607700 | 0.61130400  | -0.11575100 |
| C | -3.52523300 | 1.16820900  | 0.11400600  |
| H | -4.36039000 | 0.50274400  | 0.26876900  |
| C | -3.68131300 | 2.55043500  | 0.17767600  |
| C | -2.55748900 | 3.41157200  | 0.01702000  |
| H | -2.71093400 | 4.47991800  | 0.08865400  |
| C | -1.29105100 | 2.91676800  | -0.22955400 |
| C | -1.18401100 | 1.52013400  | -0.32547200 |
| C | 2.25166700  | 0.64481000  | -0.15450100 |
| C | 3.50918200  | 1.21603000  | 0.05298700  |
| H | 4.36021900  | 0.56557200  | 0.19974100  |
| C | 3.65414000  | 2.60839200  | 0.11240200  |
| C | 2.52664100  | 3.45158800  | -0.03039300 |
| H | 2.65898300  | 4.52111800  | 0.03387700  |
| C | 1.25743500  | 2.93240100  | -0.25471800 |
| C | 1.16736100  | 1.54050500  | -0.34712000 |
| C | -0.02420500 | 3.75906900  | -0.49295300 |
| C | -0.04202400 | 4.15699100  | -1.99262600 |
| H | -0.04378400 | 3.27088800  | -2.63048600 |
| H | 0.84149300  | 4.75147700  | -2.23814600 |
| H | -0.93665700 | 4.74237700  | -2.21981000 |
| C | -0.02463000 | 5.02823100  | 0.37177500  |
| H | -0.90651300 | 5.63874900  | 0.17090100  |
| H | 0.84480500  | 5.65042700  | 0.15420800  |
| H | -0.01270100 | 4.78055900  | 1.43486200  |
| C | -5.05190300 | 3.18554400  | 0.43902500  |
| C | -6.16363300 | 2.13821500  | 0.60054900  |
| H | -5.97898000 | 1.47315100  | 1.44757600  |
| H | -6.28016400 | 1.52408600  | -0.29562400 |
| H | -7.11730100 | 2.64031400  | 0.77989200  |
| C | -5.42160100 | 4.09973800  | -0.74812800 |
| H | -6.40114300 | 4.55762600  | -0.58333600 |
| H | -5.46601900 | 3.52913400  | -1.67910700 |
| H | -4.69815500 | 4.90578000  | -0.88584100 |
| C | -4.98802100 | 4.02114900  | 1.73490400  |
| H | -5.96076900 | 4.47719600  | 1.93992200  |



|   |             |             |             |
|---|-------------|-------------|-------------|
| H | -4.25260800 | 4.82539700  | 1.66979900  |
| H | -4.72085700 | 3.39376500  | 2.58895800  |
| C | 5.05675300  | 3.17898000  | 0.36546200  |
| C | 5.56682300  | 2.67776800  | 1.73330200  |
| H | 6.56413100  | 3.07823500  | 1.93711100  |
| H | 5.63149500  | 1.58894800  | 1.76964800  |
| H | 4.90136600  | 2.99823900  | 2.53900900  |
| C | 6.01253200  | 2.69648000  | -0.74551600 |
| H | 5.66367400  | 3.02095200  | -1.72914800 |
| H | 6.09844400  | 1.60881900  | -0.76572000 |
| H | 7.01475600  | 3.10529000  | -0.58799700 |
| C | 5.07867500  | 4.71464000  | 0.38016400  |
| H | 6.09888500  | 5.06495200  | 0.55386600  |
| H | 4.45337900  | 5.12573600  | 1.17677100  |
| H | 4.74517900  | 5.13705500  | -0.57122600 |
| C | -2.90173300 | -1.69265800 | 0.15494400  |
| C | -3.72853700 | -2.13590700 | -0.89272400 |
| C | -4.73060500 | -3.06355200 | -0.59720200 |
| H | -5.37613700 | -3.42012100 | -1.39258400 |
| C | -4.91214800 | -3.53465800 | 0.69467200  |
| H | -5.69499700 | -4.25599400 | 0.90604500  |
| C | -4.08915200 | -3.08259500 | 1.71969100  |
| H | -4.24192900 | -3.45680400 | 2.72494300  |
| C | -3.07397700 | -2.15846300 | 1.47400200  |
| C | -3.57140200 | -1.63461800 | -2.31765300 |
| H | -2.73636500 | -0.93672600 | -2.33989500 |
| C | -4.81952200 | -0.87237200 | -2.78907800 |
| H | -5.70268400 | -1.51723900 | -2.81175500 |
| H | -4.66806700 | -0.48219800 | -3.79955900 |
| H | -5.03834600 | -0.02665300 | -2.13306300 |
| C | -3.22781400 | -2.78463100 | -3.27544200 |
| H | -2.34111500 | -3.32318100 | -2.93810600 |
| H | -3.02395500 | -2.39789200 | -4.27762100 |
| H | -4.05073600 | -3.50104900 | -3.35405900 |
| C | -2.21500700 | -1.64024100 | 2.61606100  |
| H | -1.28434400 | -1.26582000 | 2.18483300  |
| C | -1.84163900 | -2.73282600 | 3.62298600  |
| H | -2.71239800 | -3.09933200 | 4.17279500  |

|   |             |             |             |
|---|-------------|-------------|-------------|
| H | -1.14067500 | -2.33899500 | 4.36164700  |
| H | -1.36886300 | -3.58196200 | 3.12647000  |
| C | -2.90054800 | -0.45810900 | 3.32292300  |
| H | -3.10933400 | 0.35825700  | 2.62978500  |
| H | -2.26625800 | -0.06745400 | 4.12447500  |
| H | -3.84972900 | -0.77176900 | 3.76803200  |
| C | 2.91336200  | -1.65039400 | 0.16820800  |
| C | 3.10362400  | -2.03795600 | 1.50980900  |
| C | 4.12991200  | -2.93748100 | 1.79805200  |
| H | 4.29734000  | -3.24968300 | 2.82233100  |
| C | 4.94406000  | -3.44373600 | 0.79149400  |
| H | 5.73552700  | -4.14513700 | 1.03555200  |
| C | 4.74182000  | -3.05325200 | -0.52437300 |
| H | 5.37894500  | -3.45389800 | -1.30551500 |
| C | 3.72971300  | -2.15097300 | -0.86100500 |
| C | 2.24649800  | -1.47156200 | 2.62993700  |
| H | 1.33220500  | -1.08033700 | 2.17857500  |
| C | 2.95442400  | -0.29502800 | 3.32329200  |
| H | 2.32036600  | 0.12846800  | 4.10822700  |
| H | 3.19403500  | 0.50088900  | 2.61703300  |
| H | 3.88875600  | -0.62449200 | 3.78793800  |
| C | 1.83020900  | -2.53538400 | 3.65114100  |
| H | 1.33230400  | -3.37557700 | 3.16455400  |
| H | 1.13869300  | -2.10579500 | 4.37954900  |
| H | 2.68496300  | -2.92261300 | 4.21169500  |
| C | 3.54241300  | -1.73887500 | -2.31006300 |
| H | 2.72072300  | -1.02608000 | -2.35205200 |
| C | 3.14756900  | -2.94232500 | -3.17826800 |
| H | 3.95195200  | -3.68231100 | -3.22622200 |
| H | 2.92611300  | -2.62043400 | -4.19946900 |
| H | 2.25816400  | -3.43510800 | -2.78252900 |
| C | 4.78860900  | -1.03331600 | -2.86555500 |
| H | 5.04198900  | -0.15220000 | -2.27155700 |
| H | 4.61290500  | -0.70432400 | -3.89372600 |
| H | 5.65989400  | -1.69454500 | -2.87440700 |

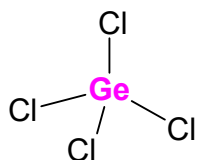

|    |             |             |             |
|----|-------------|-------------|-------------|
| Ge | 0.00000000  | 0.00000000  | 0.00000000  |
| Cl | 0.00000000  | 1.74756200  | 1.23567100  |
| Cl | 1.74756200  | 0.00000000  | -1.23567100 |
| Cl | -1.74756200 | 0.00000000  | -1.23567100 |
| Cl | 0.00000000  | -1.74756200 | 1.23567100  |

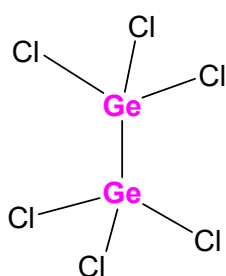

|    |             |             |             |
|----|-------------|-------------|-------------|
| Ge | -1.22453000 | 0.00000600  | 0.00000400  |
| Cl | -1.95464100 | -0.63667900 | -1.92178500 |
| Cl | -1.95462600 | -1.34593100 | 1.51232600  |
| Cl | -1.95449400 | 1.98274000  | 0.40949700  |
| Ge | 1.22453000  | -0.00000600 | -0.00000400 |
| Cl | 1.95462600  | 1.34590300  | -1.51235100 |
| Cl | 1.95449400  | -1.98274800 | -0.40946100 |
| Cl | 1.95464100  | 0.63671400  | 1.92177400  |

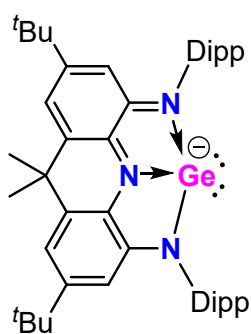

|    |             |             |            |
|----|-------------|-------------|------------|
| Ge | -0.00364200 | -1.38100200 | 0.03909300 |
|----|-------------|-------------|------------|

|   |             |             |             |
|---|-------------|-------------|-------------|
| N | 2.09925400  | -0.88834400 | -0.03783400 |
| N | 0.00851700  | 0.56245800  | -0.01437000 |
| N | -2.09952200 | -0.86259000 | 0.04060100  |
| C | 2.36156700  | 0.44768000  | -0.06219900 |
| C | 3.62268500  | 1.06749900  | -0.09120600 |
| H | 4.49736100  | 0.43158500  | -0.09817200 |
| C | 3.73476400  | 2.45833400  | -0.10934400 |
| C | 2.56297600  | 3.22991500  | -0.10418900 |
| H | 2.64383200  | 4.31096400  | -0.11895400 |
| C | 1.28801300  | 2.65406300  | -0.07752200 |
| C | 1.19868000  | 1.26242200  | -0.05270400 |
| C | 5.09897400  | 3.16362400  | -0.13025100 |
| C | 6.27158000  | 2.17126400  | -0.13815400 |
| H | 6.24616500  | 1.52188900  | -1.01658000 |
| H | 6.26872700  | 1.53400400  | 0.74950200  |
| H | 7.22073100  | 2.71609500  | -0.15359100 |
| C | 5.21121300  | 4.04099500  | -1.39365800 |
| H | 6.17996100  | 4.55270400  | -1.42899000 |
| H | 4.42839200  | 4.80144900  | -1.42627500 |
| H | 5.11389000  | 3.42981300  | -2.29475000 |
| C | 5.23955300  | 4.05394800  | 1.12142300  |
| H | 5.16264900  | 3.45187800  | 2.03058900  |
| H | 4.45709200  | 4.81434000  | 1.16370100  |
| H | 6.20871700  | 4.56607700  | 1.12985700  |
| C | -2.34761100 | 0.47560400  | 0.00806300  |
| C | -3.59550100 | 1.11165700  | -0.00032200 |
| H | -4.48423500 | 0.49166400  | 0.01878500  |
| C | -3.69335400 | 2.50775400  | -0.02977900 |
| C | -2.51768600 | 3.26440800  | -0.05284100 |
| H | -2.57768400 | 4.34417200  | -0.07416700 |
| C | -1.24645700 | 2.66796200  | -0.04825600 |
| C | -1.17271800 | 1.27864400  | -0.01845900 |
| C | -5.08788000 | 3.15066300  | -0.03438900 |
| C | -5.85345800 | 2.73088000  | 1.23743900  |
| H | -5.31680500 | 3.05452900  | 2.13329600  |
| H | -5.96762100 | 1.64694100  | 1.29659900  |
| H | -6.85440400 | 3.17723300  | 1.25629700  |
| C | -5.87065100 | 2.67552100  | -1.27589500 |
| H | -6.87165400 | 3.12142000  | -1.30100300 |
| H | -5.98602600 | 1.59015400  | -1.28530700 |
| H | -5.34610400 | 2.95862200  | -2.19241100 |
| C | -5.03116100 | 4.68504500  | -0.06862600 |
| H | -4.51145600 | 5.08953100  | 0.80378500  |
| H | -6.04559100 | 5.09587900  | -0.07112100 |

|   |             |             |             |
|---|-------------|-------------|-------------|
| H | -4.52282700 | 5.05042400  | -0.96467200 |
| C | 0.02535700  | 3.52582300  | -0.06949100 |
| C | 0.04441900  | 4.42981500  | 1.18556400  |
| H | 0.05272600  | 3.81897600  | 2.09069500  |
| H | -0.83790700 | 5.07431400  | 1.21928100  |
| H | 0.93252100  | 5.06718300  | 1.19848300  |
| C | 0.01702000  | 4.41408800  | -1.33552700 |
| H | 0.90485500  | 5.05044600  | -1.37615200 |
| H | -0.86449600 | 5.05997400  | -1.35787500 |
| H | 0.00462100  | 3.79236000  | -2.23312800 |
| C | 3.15283000  | -1.81432300 | 0.01854600  |
| C | 3.60334700  | -2.44263700 | -1.16352300 |
| C | 4.59028400  | -3.42640300 | -1.07764500 |
| H | 4.93044300  | -3.92248100 | -1.98227700 |
| C | 5.14680000  | -3.78144300 | 0.14581600  |
| H | 5.91317600  | -4.54976000 | 0.19629700  |
| C | 4.71432100  | -3.14594900 | 1.30496800  |
| H | 5.14960400  | -3.42499300 | 2.26055900  |
| C | 3.72642900  | -2.16144400 | 1.26269500  |
| C | 3.00611500  | -2.06288600 | -2.50722600 |
| H | 2.38794900  | -1.18015300 | -2.33784200 |
| C | 4.08023900  | -1.68941800 | -3.53770700 |
| H | 4.71922800  | -2.54110800 | -3.79289600 |
| H | 4.72263000  | -0.89083200 | -3.15819900 |
| H | 3.61629700  | -1.33816500 | -4.46502500 |
| C | 2.08456100  | -3.17256600 | -3.03445900 |
| H | 2.63853500  | -4.10217700 | -3.20409100 |
| H | 1.61832600  | -2.87898100 | -3.98100400 |
| H | 1.28797800  | -3.38210200 | -2.31739400 |
| C | 3.25364200  | -1.49245000 | 2.54220100  |
| H | 2.55693800  | -0.70530900 | 2.25426100  |
| C | 2.48234000  | -2.48139200 | 3.42860500  |
| H | 1.62922000  | -2.89673700 | 2.88724800  |
| H | 2.10314600  | -1.98552700 | 4.32845600  |
| H | 3.11793100  | -3.31487200 | 3.74583400  |
| C | 4.40709900  | -0.82949100 | 3.30740200  |
| H | 5.14198600  | -1.56226600 | 3.65667000  |
| H | 4.02956400  | -0.29584000 | 4.18562200  |
| H | 4.92624700  | -0.10703400 | 2.67314100  |
| C | -3.16724300 | -1.77438200 | 0.05272300  |
| C | -3.68815700 | -2.26911300 | -1.16352400 |
| C | -4.68916700 | -3.24129900 | -1.12882000 |
| H | -5.08357900 | -3.63585100 | -2.06107700 |
| C | -5.18868800 | -3.71569400 | 0.07914200  |

|   |             |             |             |
|---|-------------|-------------|-------------|
| H | -5.96513900 | -4.47546700 | 0.08948300  |
| C | -4.68770900 | -3.21009900 | 1.27385200  |
| H | -5.08105600 | -3.58043200 | 2.21634300  |
| C | -3.68722200 | -2.23682200 | 1.28192200  |
| C | -3.14768400 | -1.76493500 | -2.49058200 |
| H | -2.48394500 | -0.92947200 | -2.26607200 |
| C | -4.25967600 | -1.23929300 | -3.40836600 |
| H | -4.95322600 | -2.03154800 | -3.70861300 |
| H | -3.83325800 | -0.81204300 | -4.32168400 |
| H | -4.83759900 | -0.45737800 | -2.90981000 |
| C | -2.30489100 | -2.84321900 | -3.18754300 |
| H | -1.47942600 | -3.15963000 | -2.54619600 |
| H | -1.87944200 | -2.46385900 | -4.12273700 |
| H | -2.90570900 | -3.72780800 | -3.42443000 |
| C | -3.14296500 | -1.69759600 | 2.59341400  |
| H | -2.50292600 | -0.85005600 | 2.34592800  |
| C | -2.26425500 | -2.74425300 | 3.29451900  |
| H | -2.84050600 | -3.63983500 | 3.55064700  |
| H | -1.83679400 | -2.34137100 | 4.21893100  |
| H | -1.43970800 | -3.04894200 | 2.64611900  |
| C | -4.25367900 | -1.18470200 | 3.51968700  |
| H | -4.86210500 | -0.42926500 | 3.01638600  |
| H | -3.82361500 | -0.72772100 | 4.41671000  |
| H | -4.91976000 | -1.98900900 | 3.84857000  |

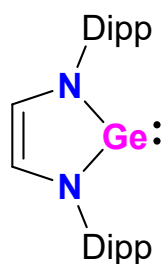

|   |             |             |             |
|---|-------------|-------------|-------------|
| C | -2.50599032 | -3.19849508 | 1.19424511  |
| H | -2.00685925 | -2.53148206 | 1.90142216  |
| H | -1.93385933 | -4.12992818 | 1.14775611  |
| H | -3.49555240 | -3.43071104 | 1.59865714  |
| C | -3.24500739 | -3.51772906 | -1.20863306 |
| H | -4.24580348 | -3.83562803 | -0.90400104 |
| H | -2.63343239 | -4.41904316 | -1.30694007 |
| H | -3.32865537 | -3.05668502 | -2.19582813 |
| C | -2.50599099 | 3.19849538  | 1.19425011  |
| H | -3.49555305 | 3.43071145  | 1.59866114  |

|   |             |             |             |
|---|-------------|-------------|-------------|
| H | -1.93385990 | 4.12992842  | 1.14776211  |
| H | -2.00686099 | 2.53148131  | 1.90142816  |
| C | -3.24500503 | 3.51773044  | -1.20862906 |
| H | -3.32865106 | 3.05668741  | -2.19582413 |
| H | -2.63342994 | 4.41904548  | -1.30693407 |
| H | -4.24580108 | 3.83562852  | -0.90399804 |
| N | 1.24894511  | -0.00000004 | -0.33689200 |
| C | 3.35465820  | -1.22805324 | -0.11709898 |
| C | 2.67259022  | -0.00000012 | -0.19769399 |
| C | 3.35465933  | 1.22805294  | -0.11709698 |
| C | 4.73792643  | 1.20317686  | 0.07335403  |
| H | 5.28439352  | 2.13698190  | 0.14943204  |
| C | 4.73792530  | -1.20317731 | 0.07335203  |
| H | 5.28439229  | -2.13698341 | 0.14942904  |
| C | 2.61292308  | -2.55278530 | -0.19622199 |
| H | 1.59824702  | -2.34301823 | -0.53874401 |
| C | 5.42570842  | -0.00000026 | 0.17153404  |
| H | 6.50038650  | -0.00000131 | 0.32261305  |
| C | 3.24500944  | 3.51773111  | -1.20862106 |
| H | 4.24580453  | 3.83563008  | -0.90398704 |
| H | 2.63343445  | 4.41904620  | -1.30692807 |
| H | 3.32865842  | 3.05669007  | -2.19581713 |
| C | 2.61292334  | 2.55278507  | -0.19621799 |
| H | 1.59824826  | 2.34301911  | -0.53874201 |
| C | 2.50598904  | -3.19849634 | 1.19424911  |
| H | 3.49555110  | -3.43071340 | 1.59866114  |
| H | 1.93385795  | -4.12992937 | 1.14775911  |
| H | 2.00685804  | -2.53148426 | 1.90142716  |
| C | 3.24500708  | -3.51772840 | -1.20862906 |
| H | 4.24580313  | -3.83562747 | -0.90399704 |
| H | 3.32865511  | -3.05668437 | -2.19582413 |
| H | 2.63343298  | -4.41904243 | -1.30693707 |
| C | 2.50598737  | 3.19849312  | 1.19425511  |
| H | 2.00685530  | 2.53147810  | 1.90143016  |
| H | 1.93385638  | 4.12992622  | 1.14776611  |
| H | 3.49554846  | 3.43070909  | 1.59866914  |
| C | -2.67258917 | 0.00000016  | -0.19769899 |
| N | -1.24894507 | 0.00000009  | -0.33689400 |

|    |             |             |             |
|----|-------------|-------------|-------------|
| C  | -3.35465815 | 1.22805328  | -0.11710298 |
| C  | -5.42570836 | 0.00000030  | 0.17152504  |
| H  | -6.50038745 | 0.00000136  | 0.32260205  |
| C  | -4.73792525 | 1.20317735  | 0.07334703  |
| H  | -5.28439225 | 2.13698345  | 0.14942304  |
| C  | -4.73792638 | -1.20317682 | 0.07334403  |
| H  | -5.28439347 | -2.13698186 | 0.14941904  |
| C  | -3.35465928 | -1.22805289 | -0.11710498 |
| C  | -2.61292203 | 2.55278534  | -0.19622199 |
| H  | -1.59824597 | 2.34301927  | -0.53874301 |
| C  | -2.61292330 | -2.55278503 | -0.19622699 |
| H  | -1.59824721 | -2.34301807 | -0.53874901 |
| Ge | -0.00000097 | -0.00000098 | 1.09913410  |
| H  | -1.31129207 | 0.00000209  | -2.47336615 |
| H  | 1.31129612  | 0.00000195  | -2.47336315 |
| C  | -0.67959302 | 0.00000106  | -1.59524509 |
| C  | 0.67959607  | 0.00000099  | -1.59524309 |

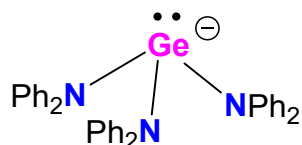

|    |             |             |             |
|----|-------------|-------------|-------------|
| Ge | -0.13314001 | 0.12373801  | -1.41478110 |
| N  | 0.64061405  | -1.55875111 | -0.59378604 |
| N  | 1.03895408  | 1.41235110  | -0.34731402 |
| N  | -1.77480013 | 0.27674602  | -0.23624302 |
| C  | 1.83216113  | -2.04845815 | -1.11045408 |
| C  | 2.20744216  | -3.40874425 | -1.01526707 |
| C  | 2.71646920  | -1.19305609 | -1.80634013 |
| C  | 3.39742825  | -3.86858028 | -1.56413611 |
| H  | 1.55066611  | -4.10564629 | -0.51053204 |
| C  | 3.89616528  | -1.66895212 | -2.36020017 |
| H  | 2.48286918  | -0.14050001 | -1.89099213 |
| C  | 4.26005531  | -3.00976722 | -2.24389616 |
| H  | 3.64822426  | -4.92187635 | -1.46369911 |
| H  | 4.54841933  | -0.97119407 | -2.87873421 |
| H  | 5.19025738  | -3.37431324 | -2.66853519 |
| C  | -0.11483201 | -2.39146517 | 0.25769902  |



|   |             |             |             |
|---|-------------|-------------|-------------|
| C | -1.39594210 | -2.82559220 | -0.10395301 |
| C | 0.39244903  | -2.79437720 | 1.50341411  |
| C | -2.16293815 | -3.59720026 | 0.76460505  |
| H | -1.80049513 | -2.54168518 | -1.06630308 |
| C | -0.36766203 | -3.57770526 | 2.36358217  |
| H | 1.38728510  | -2.47271318 | 1.78299013  |
| C | -1.65620912 | -3.97713629 | 2.00547214  |
| H | -3.16412223 | -3.89346628 | 0.46711503  |
| H | 0.04270600  | -3.86530928 | 3.32765224  |
| H | -2.25544516 | -4.57594233 | 2.68466119  |
| C | 2.01485314  | 0.98838207  | 0.58358104  |
| C | 3.37590224  | 1.25199709  | 0.35251903  |
| C | 1.66994912  | 0.27922102  | 1.73711013  |
| C | 4.35208131  | 0.82594306  | 1.24233409  |
| H | 3.65324527  | 1.79537713  | -0.54441104 |
| C | 2.65118819  | -0.15475901 | 2.62515119  |
| H | 0.63113105  | 0.07295201  | 1.94004414  |
| C | 3.99616429  | 0.11323601  | 2.38817617  |
| H | 5.39749041  | 1.03301607  | 1.03141607  |
| H | 2.35150517  | -0.70279905 | 3.51405425  |
| H | 4.75821134  | -0.23004502 | 3.08145722  |
| C | 0.95883207  | 2.77245220  | -0.61839605 |
| C | 0.27260502  | 3.26005423  | -1.75459013 |
| C | 1.48480011  | 3.74564327  | 0.26539002  |
| C | 0.13007101  | 4.62158933  | -1.98746714 |
| H | -0.14877801 | 2.55636019  | -2.46196018 |
| C | 1.34150210  | 5.10388037  | 0.01599500  |
| H | 1.98935414  | 3.41893325  | 1.16517309  |
| C | 0.66414105  | 5.56596542  | -1.11201208 |
| H | -0.40739903 | 4.94606136  | -2.87469921 |
| H | 1.75705613  | 5.81317840  | 0.72769405  |
| H | 0.55079004  | 6.62896948  | -1.29978309 |
| C | -3.03660422 | 0.03847300  | -0.75295006 |
| C | -4.21705730 | 0.36864503  | -0.04454700 |
| C | -3.21395923 | -0.55299204 | -2.02809514 |
| C | -5.47534641 | 0.11830701  | -0.57670804 |
| H | -4.13464630 | 0.82911306  | 0.93133507  |
| C | -4.47800532 | -0.78631806 | -2.55096518 |

|   |             |             |             |
|---|-------------|-------------|-------------|
| H | -2.34369117 | -0.81884006 | -2.61595419 |
| C | -5.62998740 | -0.46158003 | -1.83475113 |
| H | -6.35215448 | 0.38803103  | 0.00714000  |
| H | -4.56015833 | -1.24037709 | -3.53528725 |
| H | -6.61622250 | -0.65626105 | -2.24415216 |
| C | -1.68652412 | 0.69575705  | 1.11675808  |
| C | -1.86645014 | -0.21852702 | 2.16336716  |
| C | -1.38335410 | 2.02399315  | 1.43138710  |
| C | -1.69752912 | 0.17885101  | 3.48610125  |
| H | -2.11794315 | -1.24324709 | 1.92855514  |
| C | -1.19984208 | 2.41622218  | 2.75389320  |
| H | -1.26936009 | 2.73979520  | 0.62891505  |
| C | -1.34877109 | 1.49475111  | 3.78836727  |
| H | -1.81904413 | -0.55165504 | 4.28071431  |
| H | -0.92886607 | 3.44509225  | 2.96998122  |
| H | -1.19327509 | 1.79801013  | 4.81951935  |

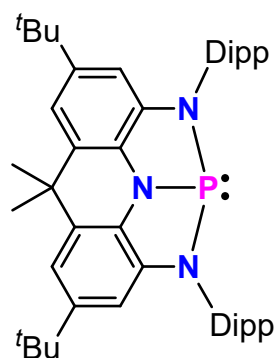

|   |             |             |             |
|---|-------------|-------------|-------------|
| N | -1.90256410 | -0.85413016 | 0.00000003  |
| N | -0.00927700 | 0.61228299  | 0.00000003  |
| N | 1.90389417  | -0.82986607 | -0.00000197 |
| C | -2.30697916 | 0.44526492  | 0.00000103  |
| C | -3.59539026 | 1.00519693  | 0.00000203  |
| H | -4.44975631 | 0.34375087  | 0.00000203  |
| C | -3.73610831 | 2.38922503  | 0.00000203  |
| C | -2.58189724 | 3.21082612  | 0.00000203  |
| H | -2.71211828 | 4.28595619  | 0.00000303  |
| C | -1.29145614 | 2.69449611  | 0.00000103  |
| C | -1.19671810 | 1.30336101  | 0.00000003  |
| C | -5.11674942 | 3.06000805  | 0.00000203  |

|   |             |            |             |
|---|-------------|------------|-------------|
| C | -6.26220546 | 2.03690495 | -0.00000297 |
| H | -6.23702149 | 1.39613990 | 0.88495910  |
| H | -6.23701948 | 1.39614690 | -0.88497003 |
| H | -7.22253559 | 2.55841197 | -0.00000097 |
| C | -5.25938945 | 3.93858511 | 1.25978012  |
| H | -6.24162152 | 4.41992512 | 1.28106713  |
| H | -4.50375142 | 4.72592118 | 1.29659113  |
| H | -5.15618943 | 3.33698107 | 2.16641219  |
| C | -5.25938445 | 3.93859311 | -1.25977106 |
| H | -5.15618143 | 3.33699507 | -2.16640612 |
| H | -4.50374642 | 4.72592818 | -1.29657306 |
| H | -6.24161655 | 4.41993412 | -1.28105806 |
| C | 2.29264917  | 0.47508503 | -0.00000197 |
| C | 3.56742125  | 1.05303710 | -0.00000197 |
| H | 4.43614432  | 0.40724808 | -0.00000297 |
| C | 3.69271022  | 2.44334020 | -0.00000097 |
| C | 2.53338012  | 3.24797124 | -0.00000097 |
| H | 2.64146011  | 4.32333931 | -0.00000097 |
| C | 1.24645004  | 2.70926317 | 0.00000003  |
| C | 1.16960307  | 1.32083807 | -0.00000097 |
| C | 5.10262331  | 3.05441728 | -0.00000297 |
| C | 5.86082536  | 2.58517226 | -1.25882905 |
| H | 5.33755632  | 2.89574327 | -2.16686712 |
| H | 5.96228642  | 1.49863919 | -1.28996406 |
| H | 6.86708844  | 3.01398032 | -1.28235906 |
| C | 5.86081938  | 2.58519627 | 1.25883712  |
| H | 6.86708045  | 3.01400832 | 1.28236513  |
| H | 5.96228340  | 1.49866419 | 1.28999113  |
| H | 5.33754336  | 2.89578227 | 2.16686619  |
| C | 5.08224628  | 4.59006539 | -0.00001697 |
| H | 4.58375023  | 4.99188041 | -0.88590903 |
| H | 6.10627036  | 4.97156744 | -0.00001197 |
| H | 4.58373523  | 4.99189741 | 0.88585810  |
| C | -0.02747007 | 3.57012720 | 0.00000103  |
| C | -0.03294909 | 4.46036527 | -1.26244506 |
| H | -0.03001607 | 3.84814622 | -2.16630412 |
| H | 0.84693196  | 5.10694233 | -1.28683506 |
| H | -0.92017917 | 5.09694729 | -1.28622306 |

|   |             |             |             |
|---|-------------|-------------|-------------|
| C | -0.03294809 | 4.46036426  | 1.26244712  |
| H | -0.92017817 | 5.09694629  | 1.28622613  |
| H | 0.84693396  | 5.10694133  | 1.28683713  |
| H | -0.03001407 | 3.84814422  | 2.16630519  |
| C | -2.83778315 | -1.92370726 | 0.00000103  |
| C | -3.28389617 | -2.44837231 | 1.22745512  |
| C | -4.18749021 | -3.51246440 | 1.20309212  |
| H | -4.54394222 | -3.93197144 | 2.13810519  |
| C | -4.63751922 | -4.04256445 | 0.00000303  |
| H | -5.33901728 | -4.87066453 | 0.00000403  |
| C | -4.18749621 | -3.51246140 | -1.20308605 |
| H | -4.54395322 | -3.93196644 | -2.13809912 |
| C | -3.28390216 | -2.44836931 | -1.22745206 |
| C | -2.81531214 | -1.87236925 | 2.55295122  |
| H | -2.09669111 | -1.08185518 | 2.33257820  |
| C | -3.97930124 | -1.23294723 | 3.32506027  |
| H | -4.74014928 | -1.97262631 | 3.59064729  |
| H | -4.46225930 | -0.45440419 | 2.72961623  |
| H | -3.62204223 | -0.77546919 | 4.25232034  |
| C | -2.08784907 | -2.92586331 | 3.39989928  |
| H | -2.75291009 | -3.74593639 | 3.68521530  |
| H | -1.69858605 | -2.47949127 | 4.31958735  |
| H | -1.24684800 | -3.35405832 | 2.85027024  |
| C | -2.81532514 | -1.87236325 | -2.55294915 |
| H | -2.09670211 | -1.08185118 | -2.33257813 |
| C | -2.08786907 | -2.92585631 | -3.39990421 |
| H | -1.24686600 | -3.35405433 | -2.85028117 |
| H | -1.69861105 | -2.47948327 | -4.31959327 |
| H | -2.75293310 | -3.74592839 | -3.68521823 |
| C | -3.97931824 | -1.23293824 | -3.32504921 |
| H | -4.74016928 | -1.97261531 | -3.59063222 |
| H | -3.62206423 | -0.77545819 | -4.25231027 |
| H | -4.46227129 | -0.45439519 | -2.72959916 |
| C | 2.85480026  | -1.88538212 | -0.00000197 |
| C | 3.30975331  | -2.40247715 | 1.22745112  |
| C | 4.23034340  | -3.45193921 | 1.20315012  |
| H | 4.59323043  | -3.86584623 | 2.13820819  |
| C | 4.68883445  | -3.97471324 | -0.00000097 |

|   |            |             |             |
|---|------------|-------------|-------------|
| H | 5.40347450 | -4.79151728 | -0.00000097 |
| C | 4.23034640 | -3.45193721 | -1.20315305 |
| H | 4.59323643 | -3.86584223 | -2.13821012 |
| C | 3.30975631 | -2.40247515 | -1.22745406 |
| C | 2.82951026 | -1.83604312 | 2.55291922  |
| H | 2.10667319 | -1.04955208 | 2.33195020  |
| C | 3.98302333 | -1.19238305 | 3.33692327  |
| H | 4.74860540 | -1.92709808 | 3.60268930  |
| H | 3.61558829 | -0.74493803 | 4.26509634  |
| H | 4.46296035 | -0.40472398 | 2.75127623  |
| C | 2.10386823 | -2.89994122 | 3.38854728  |
| H | 1.26924818 | -3.33014826 | 2.83077024  |
| H | 1.70593219 | -2.46249219 | 4.30882834  |
| H | 2.77293730 | -3.71740226 | 3.67209930  |
| C | 2.82951726 | -1.83603812 | -2.55292315 |
| H | 2.10667719 | -1.04955008 | -2.33195413 |
| C | 2.10388223 | -2.89993621 | -3.38855721 |
| H | 2.77295430 | -3.71739426 | -3.67210923 |
| H | 1.70594820 | -2.46248620 | -4.30883828 |
| H | 1.26926218 | -3.33014726 | -2.83078417 |
| C | 3.98303233 | -1.19237305 | -3.33691921 |
| H | 4.46296435 | -0.40471498 | -2.75126816 |
| H | 3.61560129 | -0.74492703 | -4.26509327 |
| H | 4.74861840 | -1.92708509 | -3.60268423 |
| P | 0.00363204 | -1.13357014 | -0.00000097 |

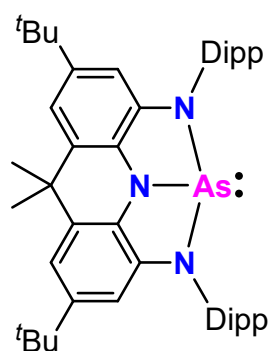

|   |             |             |             |
|---|-------------|-------------|-------------|
| N | -2.00393414 | -0.83468906 | 0.00013200  |
| N | -0.00231300 | 0.64405305  | -0.00011600 |
| N | 2.02041715  | -0.80896106 | 0.00017100  |

|   |             |            |             |
|---|-------------|------------|-------------|
| C | -2.32779317 | 0.48055903 | -0.00011800 |
| C | -3.60714126 | 1.06939908 | -0.00024200 |
| H | -4.46977232 | 0.41874403 | -0.00013200 |
| C | -3.73256727 | 2.45110518 | -0.00049800 |
| C | -2.56518719 | 3.25395323 | -0.00063100 |
| H | -2.67773120 | 4.33097331 | -0.00082800 |
| C | -1.28539109 | 2.71799420 | -0.00051600 |
| C | -1.19338308 | 1.32151910 | -0.00025800 |
| C | -5.10312437 | 3.14059123 | -0.00063600 |
| C | -6.26228944 | 2.13316615 | -0.00049400 |
| H | -6.24536042 | 1.49210511 | 0.88444306  |
| H | -6.24532343 | 1.49181311 | -0.88521906 |
| H | -7.21564353 | 2.66737419 | -0.00060200 |
| C | -5.23298138 | 4.02144329 | 1.25894609  |
| H | -6.20785647 | 4.51755932 | 1.27974409  |
| H | -4.46549932 | 4.79724434 | 1.29586609  |
| H | -5.13922337 | 3.41846025 | 2.16568916  |
| C | -5.23293838 | 4.02103629 | -1.26050709 |
| H | -5.13914237 | 3.41776125 | -2.16705116 |
| H | -4.46546132 | 4.79683135 | -1.29765010 |
| H | -6.20781646 | 4.51713933 | -1.28150109 |
| C | 2.32752617  | 0.51143804 | -0.00007200 |
| C | 3.59249026  | 1.11835408 | -0.00017600 |
| H | 4.46932832  | 0.48350303 | -0.00005300 |
| C | 3.70221926  | 2.50615018 | -0.00043200 |
| C | 2.52989118  | 3.29166323 | -0.00058600 |
| H | 2.62013919  | 4.36858831 | -0.00078400 |
| C | 1.25416209  | 2.73304820 | -0.00049200 |
| C | 1.18047609  | 1.33932610 | -0.00023500 |
| C | 5.10289737  | 3.13693923 | -0.00054100 |
| C | 5.86741743  | 2.67794219 | -1.25933709 |
| H | 5.34021036  | 2.98217222 | -2.16725215 |
| H | 5.98203045  | 1.59270212 | -1.29052109 |
| H | 6.86815749  | 3.11959122 | -1.28261109 |
| C | 5.86742642  | 2.67836819 | 1.25840409  |
| H | 6.86816447  | 3.12003022 | 1.28152309  |
| H | 5.98204643  | 1.59313912 | 1.28995309  |
| H | 5.34022338  | 2.98290122 | 2.16622016  |

|   |             |             |             |
|---|-------------|-------------|-------------|
| C | 5.06017036  | 4.67213934  | -0.00080000 |
| H | 4.55565733  | 5.06640237  | -0.88669407 |
| H | 6.07844543  | 5.06881437  | -0.00086400 |
| H | 4.55565133  | 5.06670037  | 0.88495706  |
| C | -0.02066700 | 3.59033126  | -0.00065300 |
| C | -0.02628000 | 4.48102132  | -1.26351409 |
| H | -0.02318400 | 3.86834728  | -2.16710415 |
| H | 0.85330206  | 5.12780737  | -1.28852409 |
| H | -0.91349707 | 5.11743237  | -1.28799409 |
| C | -0.02630500 | 4.48144932  | 1.26190609  |
| H | -0.91352307 | 5.11786837  | 1.28615309  |
| H | 0.85327706  | 5.12824237  | 1.28671609  |
| H | -0.02322700 | 3.86907928  | 2.16570316  |
| C | -2.99828521 | -1.84660113 | 0.00029600  |
| C | -3.46954825 | -2.35043417 | 1.22783509  |
| C | -4.41448232 | -3.37783824 | 1.20350709  |
| H | -4.78794434 | -3.78192427 | 2.13877915  |
| C | -4.88435735 | -3.89125928 | 0.00063400  |
| H | -5.61772541 | -4.69122234 | 0.00076600  |
| C | -4.41443632 | -3.37827824 | -1.20240809 |
| H | -4.78786534 | -3.78270227 | -2.13754615 |
| C | -3.46949625 | -2.35088817 | -1.22707709 |
| C | -2.97565721 | -1.79432913 | 2.55279918  |
| H | -2.26330016 | -0.99868407 | 2.33074217  |
| C | -4.12210930 | -1.16957908 | 3.36166024  |
| H | -4.87349035 | -1.91402014 | 3.64016326  |
| H | -4.62325233 | -0.38659403 | 2.78737420  |
| H | -3.74229627 | -0.72065705 | 4.28404931  |
| C | -2.22828216 | -2.86172920 | 3.36502124  |
| H | -2.88345321 | -3.69470026 | 3.63563726  |
| H | -1.83156313 | -2.43559818 | 4.29114231  |
| H | -1.38967010 | -3.26952724 | 2.79564820  |
| C | -2.97558121 | -1.79524813 | -2.55222718 |
| H | -2.26304416 | -0.99969007 | -2.33043617 |
| C | -2.22849216 | -2.86300620 | -3.36423824 |
| H | -1.38992810 | -3.27084724 | -2.79482520 |
| H | -1.83174413 | -2.43717918 | -4.29048631 |
| H | -2.88385421 | -3.69590226 | -3.63462026 |

|    |             |             |             |
|----|-------------|-------------|-------------|
| C  | -4.12198030 | -1.17047709 | -3.36115124 |
| H  | -4.87355135 | -1.91484014 | -3.63935226 |
| H  | -3.74216827 | -0.72190405 | -4.28371131 |
| H  | -4.62289033 | -0.38721703 | -2.78703720 |
| C  | 3.02911222  | -1.80672213 | 0.00037700  |
| C  | 3.50625325  | -2.30463817 | 1.22796209  |
| C  | 4.45496532  | -3.32860024 | 1.20390809  |
| H  | 4.82952235  | -3.73222327 | 2.13882215  |
| C  | 4.92560536  | -3.84100728 | 0.00079900  |
| H  | 5.66106143  | -4.63907733 | 0.00096400  |
| C  | 4.45492832  | -3.32913424 | -1.20252209 |
| H  | 4.82945535  | -3.73317227 | -2.13726815 |
| C  | 3.50621925  | -2.30517917 | -1.22700109 |
| C  | 2.99645621  | -1.75835213 | 2.55107118  |
| H  | 2.35880117  | -0.90154006 | 2.32912517  |
| C  | 4.14000930  | -1.25693309 | 3.44407825  |
| H  | 4.80898435  | -2.06789415 | 3.74525027  |
| H  | 3.74191627  | -0.80355106 | 4.35637432  |
| H  | 4.73912334  | -0.50304704 | 2.92759521  |
| C  | 2.12920615  | -2.79774120 | 3.27726624  |
| H  | 1.28749309  | -3.10802222 | 2.65352619  |
| H  | 1.72598513  | -2.38644917 | 4.20741330  |
| H  | 2.70554420  | -3.69303527 | 3.52824525  |
| C  | 2.99638321  | -1.75947112 | -2.55033419 |
| H  | 2.35881017  | -0.90250407 | -2.32874517 |
| C  | 2.12900515  | -2.79913320 | -3.27598724 |
| H  | 2.70526319  | -3.69458726 | -3.52657826 |
| H  | 1.72575813  | -2.38824817 | -4.20630230 |
| H  | 1.28730709  | -3.10905923 | -2.65205019 |
| C  | 4.13991530  | -1.25856109 | -3.44365225 |
| H  | 4.73913534  | -0.50449604 | -2.92755521 |
| H  | 3.74179327  | -0.80555706 | -4.35612331 |
| H  | 4.80879535  | -2.06971615 | -3.74451027 |
| As | 0.01198600  | -1.24241009 | 0.00023700  |



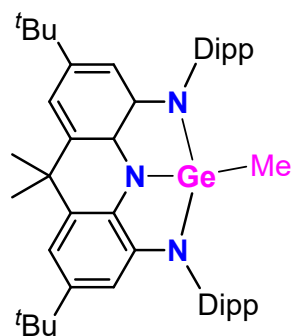

|    |             |             |             |
|----|-------------|-------------|-------------|
| Ge | 0.01787300  | -1.09882500 | -0.70364000 |
| N  | 0.03607000  | 0.73343600  | -1.02957100 |
| N  | 1.83125600  | -0.84835900 | -0.13193800 |
| N  | -1.83866100 | -0.82796700 | -0.28866900 |
| C  | 1.19568000  | 1.36780200  | -0.59226300 |
| C  | 2.18024500  | 0.50872900  | -0.08824700 |
| C  | 1.26579000  | 2.75342900  | -0.47680100 |
| C  | -1.15423200 | 1.37903000  | -0.71074500 |
| C  | 0.04647500  | 3.55515800  | -0.97426300 |
| C  | 0.02396300  | 4.97160900  | -0.39416600 |
| H  | -0.03097600 | 4.95833700  | 0.69658500  |
| H  | -0.83144400 | 5.53306700  | -0.77486900 |
| H  | 0.91844700  | 5.52494500  | -0.68678100 |
| C  | 3.49096800  | 2.45795800  | 0.50479400  |
| C  | 3.34492800  | 1.06773800  | 0.44211100  |
| H  | 4.11518200  | 0.40643400  | 0.81287000  |
| C  | -2.18432500 | 0.52860100  | -0.28784500 |
| C  | 2.84006600  | -1.84679000 | -0.03733700 |
| C  | 2.43547600  | 3.28088400  | 0.06973700  |
| H  | 2.53539800  | 4.35405600  | 0.16631000  |
| C  | -3.53323700 | 2.48966800  | 0.16592200  |
| C  | 0.03618000  | -2.77090200 | -1.70152100 |
| H  | -0.07920400 | -2.56325800 | -2.76619400 |
| H  | -0.79913000 | -3.39084500 | -1.37752700 |
| H  | 0.97771500  | -3.29230400 | -1.53830700 |
| C  | 3.73890100  | -2.00302100 | -1.11407300 |
| C  | -2.43473300 | 3.30387200  | -0.16702700 |
| H  | -2.53323800 | 4.37779400  | -0.07795200 |
| C  | 4.75110300  | -2.95838400 | -1.00558300 |
| H  | 5.45679100  | -3.08216400 | -1.82031600 |
| C  | -1.22402300 | 2.76523500  | -0.60237300 |
| C  | -3.39215200 | 1.09822200  | 0.12232800  |
| H  | -4.20002400 | 0.44531500  | 0.41950100  |
| C  | 0.12578600  | 3.64547700  | -2.51872800 |
| H  | 1.03414300  | 4.17292800  | -2.82249200 |

|   |             |             |             |
|---|-------------|-------------|-------------|
| H | -0.74090200 | 4.18288800  | -2.91314500 |
| H | 0.14300000  | 2.65132000  | -2.96826100 |
| C | -3.62309000 | -2.35487800 | -0.94407600 |
| C | -2.81350900 | -1.80159600 | 0.07026200  |
| C | 2.92969200  | -2.66516700 | 1.10906500  |
| C | 3.94888400  | -3.61848200 | 1.16185400  |
| H | 4.04054600  | -4.26100000 | 2.02804300  |
| C | 3.62806400  | -1.17500100 | -2.38565300 |
| H | 2.74461500  | -0.54204200 | -2.30158900 |
| C | -4.85038800 | 3.15058900  | 0.59846100  |
| C | 4.86067600  | -3.75909300 | 0.12184900  |
| H | 5.65039300  | -4.50024100 | 0.19002300  |
| C | 4.76923700  | 3.10928500  | 1.05286000  |
| C | -2.98509400 | -2.17013400 | 1.41972700  |
| C | 1.95502100  | -2.49372900 | 2.26740700  |
| H | 0.95401200  | -2.36577600 | 1.83964000  |
| C | -4.60199900 | -3.28205400 | -0.58325600 |
| H | -5.23825500 | -3.71353700 | -1.34827400 |
| C | -3.48281500 | -1.91816700 | -2.39310500 |
| H | -2.54222200 | -1.37212000 | -2.47894200 |
| C | 4.83755200  | -0.24453300 | -2.56320400 |
| H | 4.94347300  | 0.42538800  | -1.70876200 |
| H | 4.71943800  | 0.37081600  | -3.45969900 |
| H | 5.76594900  | -0.81346900 | -2.66896800 |
| C | 3.43424800  | -2.06770300 | -3.62135800 |
| H | 4.30776200  | -2.69821000 | -3.80768100 |
| H | 3.27456800  | -1.45507800 | -4.51325000 |
| H | 2.57071800  | -2.72706700 | -3.50532700 |
| C | -3.42659200 | -3.10313200 | -3.36656100 |
| H | -2.64788800 | -3.81688600 | -3.08718300 |
| H | -3.21425700 | -2.75115600 | -4.37994800 |
| H | -4.37465700 | -3.64607000 | -3.40599000 |
| C | -3.97784200 | -3.10223600 | 1.73210400  |
| H | -4.12953500 | -3.39551700 | 2.76505600  |
| C | -4.78133100 | -3.65434400 | 0.74321500  |
| H | -5.54961500 | -4.37414300 | 1.00657900  |
| C | -2.14649200 | -1.55821500 | 2.53027100  |
| H | -1.30544100 | -1.04005200 | 2.06436800  |
| C | -4.60872800 | -0.94342500 | -2.77751700 |
| H | -5.58786700 | -1.42546800 | -2.69844600 |
| H | -4.48569000 | -0.59895400 | -3.80855200 |
| H | -4.60854800 | -0.06692700 | -2.12754700 |
| C | -4.60879500 | 4.00174100  | 1.86185100  |
| H | -4.23836000 | 3.38141000  | 2.68210700  |

|   |             |             |             |
|---|-------------|-------------|-------------|
| H | -5.53820800 | 4.47846700  | 2.18844700  |
| H | -3.87476300 | 4.79069700  | 1.68635800  |
| C | 2.26453100  | -1.22081500 | 3.07349200  |
| H | 3.26435100  | -1.28293000 | 3.51364200  |
| H | 1.54563300  | -1.09973200 | 3.88917000  |
| H | 2.22468700  | -0.32654200 | 2.45382400  |
| C | -5.36847600 | 4.05535300  | -0.53798200 |
| H | -4.65564600 | 4.84494200  | -0.78419000 |
| H | -6.31032700 | 4.53346200  | -0.25128900 |
| H | -5.54518700 | 3.47377100  | -1.44654100 |
| C | -5.94347000 | 2.12047500  | 0.92103200  |
| H | -6.17668100 | 1.49049400  | 0.05887000  |
| H | -6.86296600 | 2.63590500  | 1.21014300  |
| H | -5.65954900 | 1.46858700  | 1.75106800  |
| C | 1.89810600  | -3.70696300 | 3.20042200  |
| H | 1.68950200  | -4.63201200 | 2.65673200  |
| H | 1.11322400  | -3.57102400 | 3.94538100  |
| H | 2.83564500  | -3.84105200 | 3.74683600  |
| C | 5.41429300  | 3.97230100  | -0.05089000 |
| H | 5.66977700  | 3.36161300  | -0.92083200 |
| H | 6.33150100  | 4.44473500  | 0.31444500  |
| H | 4.74251700  | 4.76414500  | -0.38864600 |
| C | 5.80421500  | 2.07084000  | 1.51126500  |
| H | 5.41962900  | 1.44049200  | 2.31710400  |
| H | 6.69532200  | 2.57905700  | 1.88859000  |
| H | 6.12008900  | 1.41984600  | 0.69211000  |
| C | 4.42020800  | 4.00011900  | 2.26239500  |
| H | 3.72524800  | 4.79823900  | 1.99404800  |
| H | 5.32237100  | 4.46817600  | 2.66815800  |
| H | 3.95616600  | 3.41006000  | 3.05689400  |
| C | -2.94364600 | -0.50751700 | 3.32102900  |
| H | -3.28074800 | 0.30276700  | 2.67422700  |
| H | -2.32441200 | -0.07167000 | 4.11053900  |
| H | -3.82236000 | -0.95752400 | 3.79296500  |
| C | -1.57457400 | -2.62350300 | 3.47407800  |
| H | -2.35639800 | -3.10062900 | 4.07077200  |
| H | -0.86724500 | -2.16927400 | 4.17248000  |
| H | -1.05312500 | -3.40885200 | 2.92360300  |

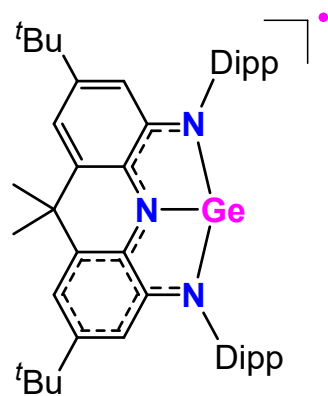

|    |             |             |             |
|----|-------------|-------------|-------------|
| Ge | 0.25623700  | -1.31370100 | 0.81059300  |
| N  | -2.12789800 | -0.92278600 | -0.05935900 |
| N  | -0.00777500 | 0.60227800  | 0.48493800  |
| N  | 2.06764600  | -0.83351200 | 0.32146400  |
| C  | -2.35100200 | 0.38900300  | 0.01363900  |
| C  | -3.61179500 | 1.01654000  | -0.21268400 |
| H  | -4.46206500 | 0.37013900  | -0.37295600 |
| C  | -3.72150500 | 2.38386800  | -0.29419800 |
| C  | -2.54863900 | 3.16991700  | -0.12152500 |
| H  | -2.64172600 | 4.24459000  | -0.19384900 |
| C  | -1.30255500 | 2.62690700  | 0.14426100  |
| C  | -1.20207700 | 1.22411900  | 0.24415800  |
| C  | -5.05194500 | 3.09049300  | -0.57326200 |
| C  | -6.20622400 | 2.09711000  | -0.76837700 |
| H  | -6.37051100 | 1.48205700  | 0.11972000  |
| H  | -6.02994100 | 1.42985400  | -1.61559600 |
| H  | -7.13290000 | 2.64165600  | -0.96535200 |
| C  | -5.39753700 | 4.00607200  | 0.61941000  |
| H  | -6.34644000 | 4.52109300  | 0.44329800  |
| H  | -4.63290000 | 4.76834000  | 0.78405000  |
| H  | -5.49206400 | 3.42526100  | 1.54045900  |
| C  | -4.92559200 | 3.93886100  | -1.85522300 |

|   |             |            |             |
|---|-------------|------------|-------------|
| H | -4.67456400 | 3.31057300 | -2.71350500 |
| H | -4.15225800 | 4.70469500 | -1.76676000 |
| H | -5.87024500 | 4.44658500 | -2.07057900 |
| C | 2.30440900  | 0.51528300 | 0.10161900  |
| C | 3.51668400  | 1.11606300 | -0.22826200 |
| H | 4.39187800  | 0.49024600 | -0.34687000 |
| C | 3.59251400  | 2.50339800 | -0.40445000 |
| C | 2.43378200  | 3.27539100 | -0.23426400 |
| H | 2.49433700  | 4.34667600 | -0.35208800 |
| C | 1.20252900  | 2.70066000 | 0.09570100  |
| C | 1.15752400  | 1.31906300 | 0.24449500  |
| C | 4.94621200  | 3.12535400 | -0.77443400 |
| C | 5.42813700  | 2.53339100 | -2.11527600 |
| H | 4.70971300  | 2.74189500 | -2.91225900 |
| H | 5.55406200  | 1.45033100 | -2.05746100 |
| H | 6.39136300  | 2.96582000 | -2.40274800 |
| C | 5.97773300  | 2.80167600 | 0.32592100  |
| H | 6.94962500  | 3.24215500 | 0.08348300  |
| H | 6.12141000  | 1.72573500 | 0.44293800  |
| H | 5.65460800  | 3.20028100 | 1.29111200  |
| C | 4.87172000  | 4.65172400 | -0.92545000 |
| H | 4.17461400  | 4.94954100 | -1.71285300 |
| H | 5.85584300  | 5.04501500 | -1.19262100 |
| H | 4.56577900  | 5.13852000 | 0.00425600  |
| C | -0.06469800 | 3.49135600 | 0.43268600  |
| C | -0.11590700 | 4.82658100 | -0.32279400 |
| H | -0.15522500 | 4.67117700 | -1.40291000 |
| H | 0.76103000  | 5.43378100 | -0.09557000 |
| H | -0.98309100 | 5.41891100 | -0.02679700 |

|   |             |             |             |
|---|-------------|-------------|-------------|
| C | -0.04193100 | 3.77699000  | 1.95729000  |
| H | -0.93953900 | 4.32516800  | 2.25711300  |
| H | 0.83814200  | 4.36959600  | 2.22000500  |
| H | -0.00533000 | 2.84593100  | 2.52651700  |
| C | -3.16420400 | -1.85860000 | -0.04309100 |
| C | -4.01356000 | -2.00734500 | 1.07902700  |
| C | -4.99666800 | -2.99733500 | 1.03517400  |
| H | -5.65119800 | -3.13299300 | 1.88982300  |
| C | -5.14392900 | -3.82281600 | -0.07156600 |
| H | -5.91956600 | -4.58150000 | -0.08482700 |
| C | -4.28115400 | -3.68893200 | -1.15632400 |
| H | -4.39387900 | -4.34940700 | -2.00782500 |
| C | -3.27750500 | -2.72501600 | -1.15880500 |
| C | -3.81471200 | -1.20464000 | 2.35621700  |
| H | -3.05973400 | -0.44120000 | 2.17037600  |
| C | -5.09110200 | -0.47612900 | 2.79810800  |
| H | -5.89367600 | -1.17537800 | 3.04770800  |
| H | -5.45753400 | 0.18819900  | 2.01270400  |
| H | -4.89622600 | 0.13066700  | 3.68689400  |
| C | -3.27119900 | -2.10790000 | 3.47566300  |
| H | -3.98478000 | -2.89466500 | 3.73601500  |
| H | -3.07048500 | -1.52467400 | 4.37940700  |
| H | -2.34044000 | -2.59094400 | 3.16904100  |
| C | -2.34527700 | -2.53067900 | -2.34155400 |
| H | -1.37809500 | -2.22348900 | -1.92968200 |
| C | -2.12427800 | -3.80027200 | -3.16766600 |
| H | -1.80727800 | -4.63842300 | -2.54228100 |
| H | -1.34796500 | -3.63002500 | -3.91723000 |
| H | -3.02742500 | -4.10251200 | -3.70562100 |

|   |             |             |             |
|---|-------------|-------------|-------------|
| C | -2.83749000 | -1.37944800 | -3.23653700 |
| H | -3.81143800 | -1.62146600 | -3.67295000 |
| H | -2.13567600 | -1.19807200 | -4.05622300 |
| H | -2.94260200 | -0.45086400 | -2.67331000 |
| C | 3.14078100  | -1.76357600 | 0.18394500  |
| C | 3.94445600  | -2.06552900 | 1.29878500  |
| C | 4.95750100  | -3.01498400 | 1.14786100  |
| H | 5.58105900  | -3.27079600 | 1.99812700  |
| C | 5.17946000  | -3.63777900 | -0.07418000 |
| H | 5.96865000  | -4.37632900 | -0.17204600 |
| C | 4.39487300  | -3.30836500 | -1.17289300 |
| H | 4.58122100  | -3.79193900 | -2.12606400 |
| C | 3.37259500  | -2.36320400 | -1.06822400 |
| C | 3.72428000  | -1.38851400 | 2.64092600  |
| H | 2.96060700  | -0.62233300 | 2.50088500  |
| C | 4.99222300  | -0.67930000 | 3.13754900  |
| H | 5.80418500  | -1.38492200 | 3.33447500  |
| H | 4.78971800  | -0.14244900 | 4.06874600  |
| H | 5.34834400  | 0.04618700  | 2.40259100  |
| C | 3.19349800  | -2.38542400 | 3.68201400  |
| H | 2.26494200  | -2.85111400 | 3.34218000  |
| H | 2.99275500  | -1.88357600 | 4.63323300  |
| H | 3.91494400  | -3.18543700 | 3.87202800  |
| C | 2.53240500  | -2.00286100 | -2.28211500 |
| H | 1.90196200  | -1.15655900 | -2.00615000 |
| C | 1.60336700  | -3.16096600 | -2.67427700 |
| H | 2.17303300  | -4.04976800 | -2.96052300 |
| H | 0.97099800  | -2.88074900 | -3.52122800 |
| H | 0.94928000  | -3.44235100 | -1.84494900 |

|   |            |             |             |
|---|------------|-------------|-------------|
| C | 3.39809600 | -1.55307900 | -3.46730800 |
| H | 4.04320500 | -0.71756800 | -3.18569000 |
| H | 2.76635800 | -1.22529100 | -4.29780300 |
| H | 4.03596800 | -2.36005300 | -3.83852200 |

## 6. References

- S1. M. K. Mondal, L. Zhang, Z. Feng, S. Tang, R. Feng, Y. Zhao, G. Tan, H. Ruan, and X. Wang, *Angew. Chem., Int. Ed.*, 2019, **58**, 15829–15833.
- S2. M. J. Frisch, G. W. Trucks, H. B. Schlegel, G. E. Scuseria, M. A. Robb, J. R. Cheeseman, G. Scalmani, V. Barone, G. A. Petersson, H. Nakatsuji, X. Li, M. Caricato, A. V. Marenich, J. Bloino, B. G. Janesko, R. Gomperts, B. Mennucci, H. P. Hratchian, J. V. Ortiz, A. F. Izmaylov, J. L. Sonnenberg, D. Williams-Young, F. Ding, F. Lipparini, F. Egidi, J. Goings, B. Peng, A. Petrone, T. Henderson, D. Ranasinghe, V. G. Zakrzewski, J. Gao, N. Rega, G. Zheng, W. Liang, M. Hada, M. Ehara, K. Toyota, R. Fukuda, J. Hasegawa, M. Ishida, T. Nakajima, Y. Honda, O. Kitao, H. Nakai, T. Vreven, K. Throssell, J. A. Montgomery, Jr., J. E. Peralta, F. Ogliaro, M. J. Bearpark, J. J. Heyd, E. N. Brothers, K. N. Kudin, V. N. Staroverov, T. A. Keith, R. Kobayashi, J. Normand, K. Raghavachari, A. P. Rendell, J. C. Burant, S. S. Iyengar, J. Tomasi, M. Cossi, J. M. Millam, M. Klene, C. Adamo, R. Cammi, J. W. Ochterski, R. L. Martin, K. Morokuma, O. Farkas, J. B. Foresman, and D. J. Fox, Gaussian, Inc., Wallingford CT, 2016.
- S3. a) A. D. Becke, *J. Chem. Phys.*, 1993, **98**, 5648–5652; b) C. Lee, W. Yang and R. G. Parr, *Phys. Rev. B*, 1988, **37**, 785–789.
- S4. D. A McLean and G. S. Chandler, *J. Chem. Phys.*, 1980, **72**, 5639–5648.
- S5. NBO 7.0, E. D. Glendening, J. K. Badenhoop, A. E. Reed, J. E. Carpenter, J. A. Bohmann, C. M. Morales, P. Karafiloglou, C. R. Landis, F. Weinhold, Theoretical Chemistry Institute, University of Wisconsin, Madison, WI, **2018**.
- S6. J. P. Perdew, K. Burke, M. Ernzerhof, *Phys. Rev. Lett.*, 1996, **77**, 3865–3868.
